# Supplementary material for: HNF1A deficiency causes reduced calcium levels, accumulation of abnormal insulin granules and uncoupled insulin to C-peptide secretion in a stem cell model of MODY3
Source: Research Square preprint supplement (doi:10.21203/rs.3.rs-509878/v1), 2021-06-01
Supplement: Supplementary file 1 [file dc20de228b2b860b573918cc.xlsx]

## Sheet: Table S1
		Primers
	Gene	Forward	Reverse
	HNF1A (exon3)	GTTCTAGCTGTAAGCTCCTCTGGTT	AGAGAATCGAATTGGGTGAGCATCC
	HNF1A (exon1)	GCAGGGCTGAAGTCCAAAGTTCAGT	CCCAGTTCTCCAGGCATTTGAGTTG
	HNF1A Surveyor	GCAGGGCTGAAGTCCAAAGTTCAGT	CCCAGTTCTCCAGGCATTTGAGTTG
	Glucagon	CAAGGCAGCTGGCAACGT	CTGGTGAATGTGCCCTGTGA
	Insulin	TTCTACACACCCAAGACCCG	CAATGCCACGCTTCTGC
	GAPDH	AATCCCATCACCATCTTCCA	TGGACTCCACGACGTACTCA
	CACNA1C	CAGCTGGCCTAAGGACTCAA	GCGCTATGGTGCCAAGAAAA
	SDK1	TTTTATGATGAGCCTTGGGAG	CTCCCTGGAATGTGTCCTTTTT
	BANF2	CCAAGACGCCAATGGTTCAC	TCTTTAGACGTGGCACCAGC
	PAX4	GCCAACCTGCAGTGTTTTAGT	CGCAAGCTGCTTTCTTTGAGAG
	SYT13	TTTCTGACACCCAAGGTCAC	AGCTGCCGCTTCTTTAGG
	CACNA1A	GATGTCCCGAGCTGCTATCC	GAAGGATCCACTCTCCGCTG
	KCHN6	CTGAGCCCGAGGACAGA	CCTTGCCCGGTTAGAAGTTAG
		Oligos
	oligo id	Forward	Reverse
	HNF1A sgRNA#12	TTTCTTGGCTTTATATATCTTGTGGAAAGGACGAAACACCGGATGAGCTACCAACCAAGA	GACTAGCCTTATTTTAACTTGCTATTTCTAGCTCTAAAACTCTTGGTTGGTAGCTCATCC
	HNF1A sgRNA#14	TTTCTTGGCTTTATATATCTTGTGGAAAGGACGAAACACCGTGCTGGGCCCCACTTGAAA	GACTAGCCTTATTTTAACTTGCTATTTCTAGCTCTAAAACTTTCAAGTGGGGCCCAGCAC
	HNF1A sgRNA#9	TTTCTTGGCTTTATATATCTTGTGGAAAGGACGAAACACCGACCATGGCTCGGCTGCCAC	GACTAGCCTTATTTTAACTTGCTATTTCTAGCTCTAAAACGTGGCAGCCGAGCCATGGTC
	oligo id	RNA-based from IDT
	SYT13 sgRNA	ATGTCTGTGTCATGGAGACC
	PAX4 sgRNA	gcctggagcatgcatcagga
	CACNA1A sgRNA	CGAGATGCCGGCCCGCTACG
	HNF1A ssDNA temp. #1	ccactcacggctttctgtgcctgcagAGTTCACCCATGCAGGGCAGGGAGGGCTGATTGAAGAGCCCACAGGTGATGAGCTACCAACCAAGAAGGGGCgGAGGAATCGTTTCAAGTGGGGCCCAGCATCCCAGCAGATCCTGTTCCAGGCCTATGAGAGGCAGAAGAACCCTAGCAAGGAGGAGCGAGAGACGCTAGT
	HNF1A ssDNA temp. #2	ccactcacggctttctgtgcctgcagAGTTCACCCATGCAGGGCAGGGAGGGCTGATTGAAGAGCCCACAGGTGATGAGCTACCAACCAAGAAGGGGCaGAGGAATCGTTTCAAGTGGGGCCCAGCATCCCAGCAGATCCTGTTCCAGGCCTATGAGAGGCAGAAGAACCCTAGCAAGGAGGAGCGAGAGACGCTAGT

## Sheet: Table S2
	Off target site		Mismatches	Chromosome	Cut Site/hg38	PAM	Gene
	ATGGTGGGGCCCACTTGAAA		2	chr12	2601579	GGG	CACNA1C
	TTGCTGTGCCCCATTTGAAA		3	chr7	3.668.999	AGG	SDK1
	ATGTTAGGCCCCACTGGAAA		3	chr20	17701196	AGG	BANF2
			Off target gene sequence (Sanger Sequencing)
	Cell Line	Internal Reference	CACNA1C	SDK1	BANF2
	hESC-Mel1	Mel1 (WT)	WT	WT	WT
	hESC-Mel1	Mel1-C30 (Het)	WT	WT	WT
	hESC-Mel1	Mel1-C13 (KO1)	WT	WT	WT
	hESC-Mel1	Mel1-C23 (KO2)	WT	WT	WT
	hESC-Mel1	Mel1-R200Q-C15 (Hom)	WT	WT	WT
	iPSC-Control	1023A	WT	WT	WT
	iPSC-MODY3-Pt3	1076A-C23 (corr)	WT	WT	WT
	iPSC-MODY3-Pt3	1076A-C8 (Pt3-KO)	WT	WT	WT

## Sheet: Table S3
	HNF1A KO1	Log2 Fold Change	-Log10 p-value			HNF1A KO2	Log2 Fold Change	-Log10 p-value
			Down-regulated	Up-regulated				Down-regulated	Up-regulated
	DPP4	-3.51387	15.8148			ZNF714	-4.47115	17.4319
	IHH	-4.45665	15.0486			A1CF	-3.37999	15.6127
	S100A6	-3.91574	13.5926			MUC15	3.70329		15.6338
	A1CF	-2.85579	11.2298			DPP4	-2.89962	11.2822
	CEBPA	-3.24524	10.9275			FTCD	-3.50439	11.3262
	C8orf55	4.66302		10.7324		DPEP1	-3.23691	11.1465
	ANKS4B	-4.29906	10.4881			SGK2	-3.88655	10.825
	F2	-3.32048	10.4757			NBEAL2	-2.38323	9.99247
	SLC39A5	-3.77227	10.0361			FGFR3	-3.35752	9.91437
	SGK2	-3.6254	9.8973			GAL3ST1	-2.55722	9.50403
	NPC1L1	-2.47811	9.64627			MAOA	3.19797		9.20381
	LAD1	-3.39652	9.58872			HNF1A	-2.93258	9.0591
	DPEP1	-2.9523	9.30368			ZNF248	-2.81237	9.0041
	KCNH6	-2.0888	8.73386			FGFR4	-3.2647	8.94995
	LAMB3	-3.69357	8.7048			GLYCTK	-2.66086	8.08959
	FGA	-3.81004	8.24015			BEX5	3.02909		7.98147
	IGFBP1	-3.82468	8.24171			IHH	-3.04164	7.67489
	TM4SF4	-3.43864	7.97663			ABI3BP	3.37292		7.5167
	LOC440905	3.86393		7.67516		EHHADH	-3.51213	7.54711
	FGFR4	-2.95591	7.42453			GCOM1	-3.1902	7.50188
	MGAM	-2.53883	7.17998			ANKS4B	-3.53021	7.4401
	LGI4	-3.29448	7.01644			NPC1L1	-2.11809	7.3768
	FLJ44635	-3.50085	6.99218			SMTNL2	-3.24787	7.38674
	AGPAT2	-2.15512	6.65447			ADAMTS18	2.44933		7.35555
	MIA2	-3.4855	6.61575			PCSK9	-3.60645	7.04998
	FGB	-3.38697	6.56952			SERPINA1	-2.7575	7.06511
	PLCG2	-2.45192	6.46859			ARSE	-3.31388	6.85977
	HGD	-3.01315	6.37385			SERPINA10	-3.47407	6.8579
	SLC14A2	-3.29277	6.3753			ABCC3	-3.10974	6.72019
	GALNT3	-2.19043	6.34405			ETV4	-2.72753	6.41004
	LOXL2	-2.07449	6.33583			GPR113	-2.31662	6.34861
	C17orf109	-2.31338	6.28643			LOC100506930	-3.48579	6.35692
	PCSK9	-3.33374	6.16338			NKAIN4	2.36517		6.38801
	ARSE	-3.05534	6.06441			PROC	-2.79772	6.35501
	FTCD	-2.42496	6.05866			VWA5B2	-2.27517	6.30895
	SCRT2	2.45457		6.0787		KIT	-2.29311	6.18445
	ERBB3	-2.70521	5.99509			NPNT	1.96425		6.16082
	LOC730102	-2.43689	5.85383			LUZP2	3.00966		6.12467
	HK2	-2.05165	5.81468			ZFP36L2	-1.76659	6.10857
	ANPEP	-3.01231	5.79259			PLCG2	-2.34248	6.04988
	SLIT3	2.27857		5.58836		KIFC3	-2.5372	6.02095
	AQP2	-2.22806	5.43595			CEBPA	-2.29196	5.99005
	SERPINA10	-2.97758	5.44302			MAP3K13	-2.10529	5.95719
	HPN	-2.15842	5.41434			LGI4	-2.89602	5.60538
	PRODH2	-3.17631	5.41879			KCNH6	-1.60221	5.51909
	NBEAL2	-1.69215	5.29797			PENK	2.36395		5.52459
	AGT	-2.50515	5.22005			LIPC	-3.05844	5.49484
	IGFBP3	-2.45763	5.11341			MGAM	-2.18965	5.46888
	GLYCTK	-2.05152	5.10131			PRODH2	-3.16994	5.41724
	LINGO1	1.62495		5.09292		CHODL	2.22186		5.39645
	GRIA1	1.89		5.0119		LAD1	-2.39568	5.38888
	PTGS2	-2.59375	4.9089			MPPED2	2.3442		5.36784
	EGFL7	-1.72591	4.87492			EGR1	-2.88732	5.3473
	LIPC	-2.8701	4.87101			LOXL2	-1.8664	5.33598
	PROC	-2.40438	4.87265			GABRA3	2.75957		5.32335
	ANXA13	-2.87776	4.85669			C5	-2.38751	5.30383
	HABP2	-2.58772	4.80236			ANXA13	-3.02801	5.08462
	RDH12	-2.77264	4.79785			CDH18	1.57272		5.01902
	FXYD3	-2.54192	4.78821			FSTL5	1.82462		5.02148
	LOC100499467	-1.70767	4.76017			PLA1A	-2.93008	5.02689
	S100A16	-2.09861	4.76027			HNF1A-AS1	-2.93938	4.98863
	C2orf54	-1.88935	4.71492			FOS	-2.76085	4.88944
	DEPTOR	-2.17663	4.69669			PGM5	-2.67531	4.85128
	HNF1A	-2.03307	4.70563			ARHGEF10L	-1.5445	4.7999
	MSMB	-2.34967	4.7025			SLC6A19	-2.67329	4.73332
	ADAMTS18	1.95246		4.60782		PPY	-2.1794	4.6943
	GOLT1A	-2.04143	4.60474			SCTR	-1.9662	4.66013
	HNF1A-AS1	-2.72032	4.57774			ITIH1	-2.76066	4.65303
	GAS7	2.32565		4.5312		CASR	-1.98119	4.62159
	PCK1	-2.75936	4.4906			TMEM130	1.53431		4.56473
	C5	-2.14044	4.45735			GPR126	2.26575		4.46501
	C17orf110	-2.18805	4.43749			TRPM2	-2.5007	4.45752
	CEACAM1	-2.12545	4.3913			CRHBP	1.71983		4.44549
	GJD2	-2.54107	4.38068			ASCL2	-2.09307	4.41211
	ITIH1	-2.66039	4.383			B3GNT7	1.5575		4.36042
	SLC16A12	-1.58403	4.37767			ADRB1	-2.50246	4.34666
	SLC38A5	-2.4277	4.36864			TRPC7	-2.4736	4.3239
	SERPINF2	-2.23796	4.34313			EPS8L3	-2.68294	4.28746
	USH1C	-1.94601	4.33211			MIA2	-2.66194	4.26463
	CDC42EP1	-2.04995	4.30801			USH1C	-1.90566	4.23782
	SGMS2	-1.66637	4.30188			LAMB3	-2.39453	4.09083
	SMTNL2	-2.21044	4.27597			GRASP	-2.18861	4.05238
	PLA1A	-2.56072	4.25979			TRH	2.46977		4.05236
	CARD10	-1.89521	4.17936			LOC157627	-2.46475	4.02876
	EPS8L3	-2.63318	4.20857			RASGRP1	-1.86737	4.01713
	LINC00473	-2.07777	4.18274			HGD	-2.26968	3.96586
	LLGL2	-1.44712	4.20233			SLITRK6	1.68764		3.9495
	NDRG1	-2.157	4.18492			LRRC31	-2.70779	3.93477
	PDZK1	-1.62522	4.20044			PROM1	-1.61993	3.93645
	SPINK1	-2.0796	4.18162			HAAO	-2.5051	3.90322
	ZFP36L2	-1.43945	4.19679			C20orf103	-2.28047	3.85001
	SH3TC1	-1.62403	4.16469			WNK4	-2.00753	3.83389
	STMN4	2.1351		4.1545		CYP3A5	-2.2171	3.82154
	GLTPD2	-2.16156	4.11804			CRYBB1	1.97024		3.79014
	KIT	-1.80093	4.11641			TM4SF4	-2.24139	3.79058
	SLC6A19	-2.43447	4.12536			FLJ16779	2.25348		3.77478
	CDH16	-2.78857	3.98231			MUM1L1	2.72478		3.74691
	MFNG	-2.60236	3.9665			NTNG1	2.0993		3.74981
	CALCR	-2.62866	3.95062			PITX1	2.29394		3.7555
	FBXO17	-1.64689	3.94989			IGFBP1	-2.42307	3.73983
	APOA2	-2.48145	3.9249			SULF1	2.23323		3.73561
	DENND1C	-1.80523	3.91183			GRIP2	-2.25021	3.71747
	C5orf32	-1.43421	3.89744			GJD2	-2.30625	3.69741
	CLDN4	-2.31247	3.86808			DTX1	1.87193		3.67075
	ABCC3	-2.12837	3.80536			CDH16	-2.61475	3.5853
	RFX6	-1.27991	3.80621			SLC39A5	-2.08272	3.58052
	GCOM1	-1.97995	3.78333			TMEM86B	-2.00331	3.57991
	VIL1	-1.62546	3.75575			GUCY2C	-2.09461	3.56091
	C14orf105	-2.59716	3.72457			SLC26A4	2.26662		3.53826
	FGFR3	-1.86189	3.72684			RDH12	-2.30451	3.52171
	GPR119	-1.86688	3.72862			CD55	1.36794		3.49079
	KIAA0040	-1.5618	3.72313			HMP19	1.63551		3.44364
	FBN1	-2.12353	3.6939			MAOB	-2.02508	3.42999
	LOC100124692	-2.16956	3.69018			HNF4A	-1.52109	3.08938
	HMGCS2	-2.18385	3.685
	HPSE	-1.94803	3.67764
	ZNF385D	2.21158		3.65878
	LPPR3	1.43496		3.63768
	CGN	-1.32408	3.57064
	ASPH	-1.23227	3.54622
	ELMO1	1.30655		3.5378
	SERPINA1	-1.88348	3.54338
	SULF2	1.27971		3.53865
	ARHGAP36	2.11077		3.52689
	SNTB1	-1.81006	3.49258
	TFPI	-2.33311	3.48026
	KITLG	1.90263		3.44207
	FREM2	1.56833		3.43588
	GUCY2C	-2.063	3.43345
	ANG	-1.81838	3.4256
	TLR5	-1.41885	3.42611
	TMPRSS2	-1.95323	3.42018
	IL17RB	-1.4393	3.40585
	NAALADL1	-2.3448	3.39572
	ATP8B1	-2.09941	3.36435
	ANXA4	-1.64816	3.35423
	AQP3	-1.24191	3.34825
	C4orf19	-1.78062	3.35549
	GPC3	-1.64834	3.34955
	MAOB	-1.95703	3.35164
	ALDH1A1	-1.44133	3.34481
	FABP1	-2.51882	3.33087
	ZNF280D	-2.27849	3.32369
	C8G	-2.1524	3.29635
	CP	-2.28357	3.29582
	GPR146	-1.53783	3.29875
	SDC4	-2.09413	3.29677
	C60rf145	-1.49592	3.27948
	HNF4A	-1.52939	3.06926

## Sheet: Table S4
	Analysis	Term	P-value	Z-score	Combined score	Genes
	KEGG	Maturity onset of the young	0.00215	-1.84	11.303	RFX6;IAPP
	KEGG	MAPK signaling pathway	0.00463	-1.972	10.601	RRAS2;CACNA1A;HSPA1B;FGFR1
	KEGG	Synaptic vesicle cycle	0.01213	-1.631	7.1952	CACNA1A;AP2A2
	KEGG	Endocytosis	0.03128	-1.863	6.456	SH3KBP1;AP2A2;HSPA1B
	TF	CEBPB	0.00105	-1.743	11.941	DPP4;RASSF1;SERPINA1;HDAC3;SPOCK2;CEP120;KIAA1671;RRAS2;SPOCK1;DPEP1;NDRG1
	TF	MIR138	0.00265	-1.751	10.3918	RBM47;RASSF1;SERPINA1;S100A6;RRAS2;SPOCK1;DPEP1;MT1X;EPC2;AP2A2
	TF	PDX1	0.00935	-2.113	9.8751	DPEP1;IAPP
	TF	NFE2	0.00325	-1.613	9.2377	ANKRD13B;RBM47;SH3KBP1;PAQR3;KIAA0141;RRAS2;NDRG1;BRI3BP;RASSF1;DPEP1;SPOCK1;GHRL;GAST;HSPA1B;LLGL2
	TF	SP1	0.01866	-1.588	6.3241	CALB2;HDAC3;SH3KBP1;CROCC;PAQR3;CACNA1A;NEFM;FOXK1;EPC2;BRI3BP;TNFSF13B;LLGL2
	TF	FOXF1	0.02503	-1.698	6.2639	SLC44A5;SVIL;MBNL2;CROCC;DPYSL3;KIAA0141;NDRG1;EHBP1
	TF	LTF	0.02613	-1.648	6.0087	DPP4;FAM188A;RBM47;HDAC3;USP21;CROCC;KIAA0141;NDRG1
	TF	SP1	0.03071	-1.661	5.7876	ANKRD13B;KCNH6;SH3KBP1;SPOCK2;DPEP1;RRAS2;AP2A2;LLGL2
	TF	CEBPE	0.04467	-1.807	5.6185	SPOCK2;NDRG1
	TF	E2F1	0.02513	-1.514	5.5804	SLC44A5;HDAC5;SVIL;RBM47;HDAC3;SH3KBP1;USP21;CACNA1A;EHBP1;RASSF1;DPYSL3;DPEP1;EPC2;FGFR1
	TF	MZF1_1-4	0.04765	-1.759	5.3563	RBM47;RASSF1;NCLN;SERPINA1;RFX6;USP21;CEP120;S100A6;SPOCK1;NBEAL2;NEFM;ZFP37
	TF	REPIN1	0.03802	-1.638	5.3556	CALB2;SVIL;TMEM37;RASSF1;DPYSL3;RRAS2;FOXK1;FGFR1
	TF	SREBF1	0.03546	-1.544	5.1576	CALB2;RASSF1;KCNH6;SH3KBP1;USP21;CROCC;SPOCK2;DPYSL3;CACNA1A;RRAS2;FOXK1;LLGL2
	TF	FOXJ1	0.04042	-1.594	5.117	SVIL;NCLN;RFX6;PAQR3;KIAA1671;NBEAL2;NEFM;HSPA1B
	TF	RBPJ	0.04779	-1.574	4.7867	RASSF1;SH3KBP1;KIAA0141;RRAS2;DPEP1;NBEAL2;AP2A2;A1CF
	TF	JUN	0.04374	-1.479	4.6307	SVIL;SERPINA1;HDAC3;CEP120;KIAA1671;CACNA1A;NBEAL2;NDRG1;DPP4;FAM188A;S100A6;GAST;EPC2
	TF	TEAD1	0.04965	-1.529	4.5937	CALB2;MBNL2;NCLN;DPYSL3;KIAA1671;RRAS2;DPEP1;LLGL2
	TF	WT1	0.04584	-1.439	4.4376	ANKRD13B;SH3KBP1;DPYSL3;DPEP1;RRAS2;GHRL;EPC2;FOXK1;ABCA7;AP2A2;HSPA1B;LLGL2
	TF	HNF1A	0.05329	-1.468	4.3058	SVIL;RBM47;SH3KBP1;USP21;CEP120;CACNA1A;IAPP;A1CF;FGFR1
	GO_BP	regulation of insulin secretion (GO:0050796)	4e-05	-2.859	28.9819	DPP4;RFX6;CACNA1A;LLGL2
	GO_BP	negative regulation of cysteine-type endopeptidase activity involved in apoptotic process (GO:0043154)	0.00219	-4.635	28.3861	HDAC3;KIAA0141;DPEP1;GHRL;HSPA1B
	GO_BP	positive regulation of insulin secretion (GO:0032024)	0.00021	-3.177	26.8553	DPP4;RFX6;CACNA1A;GHRL
	GO_BP	negative regulation of dendrite extension (GO:1903860)	0.00048	-3.344	25.5827	PAQR3;DPYSL3;SPOCK1;HSPA1B
	GO_BP	negative regulation of apoptotic process (GO:0043066)	0.00777	-5.163	25.0804	HDAC3;DPEP1;GHRL;NDRG1;HSPA1B
	GO_BP	response to potassium ion (GO:0035864)	0.0003	-2.954	23.9076	MT1X;NDRG1
	GO_BP	positive regulation of motile cilium assembly (GO:1905505)	0.00037	-2.986	23.5698	CROCC;CEP120

## Sheet: Table S5
	SCbeta-like-cells (From cluster 0)						SCalpha-like cells (Cluster 2a)						Bihormonal SCalpha/beta-cells (Cluster 2b)						Pancreatic progenitor cells (Cluster 6)
	Analysis	Term	P-value	Adjusted P-value	Genes		Analysis	Term	P-value	Adjusted P-value	Genes		Analysis	Term	P-value	Adjusted P-value	Genes		Analysis	Term	P-value	Adjusted P-value	Genes
	KEGG	PPAR signaling pathway_Homo sapiens_hsa03320	5.65038e-06	0.000723248	SCD;APOA2;APOA1;APOC3;DBI		KEGG	Long-term potentiation_Homo sapiens_hsa04720	1.54548e-05	0.00156807	PPP1R1A;ADCY1;CALM1;CALM2;ATF4		KEGG	Glycolysis / Gluconeogenesis_Homo sapiens_hsa00010	1.47534e-06	0.000203597	LDHA;TPI1;PKM;PGK1;PDHB;ENO1		KEGG	Thyroid cancer_Homo sapiens_hsa05216	0.00228863	0.176225	CCND1;TFG
	KEGG	Maturity onset diabetes of the young_Homo sapiens_hsa04950	0.000118916	0.00761065	NEUROD1;PAX4;INS		KEGG	Gastric acid secretion_Homo sapiens_hsa04971	2.70357e-05	0.00156807	GAST;ADCY1;SSTR2;CALM1;CALM2		KEGG	Glucagon signaling pathway_Homo sapiens_hsa04922	1.61987e-05	0.00111771	LDHA;PKM;GCG;PDHB;CALM1;CALM2		KEGG	Prolactin signaling pathway_Homo sapiens_hsa04917	0.0134758	0.328292	CCND1;INS
	KEGG	Glycolysis / Gluconeogenesis_Homo sapiens_hsa00010	0.00196544	0.0838586	LDHA;PKM;ENO2		KEGG	Circadian entrainment_Homo sapiens_hsa04713	8.99022e-05	0.00347622	GNG3;ADCY1;CALM1;CALM2;GRIA4		KEGG	Pathogenic Escherichia coli infection_Homo sapiens_hsa05130	0.000206504	0.0076076	ITGB1;TUBA1A;YWHAQ;ACTB		KEGG	PPAR signaling pathway_Homo sapiens_hsa03320	0.0124263	0.328292	APOA1;DBI
	KEGG	Insulin secretion_Homo sapiens_hsa04911	0.00386434	0.123659	RAB3A;VAMP2;INS		KEGG	Amphetamine addiction_Homo sapiens_hsa05031	0.0002912	0.00727316	CALM1;CALM2;ATF4;GRIA4		KEGG	HIF-1 signaling pathway_Homo sapiens_hsa04066	0.00022051	0.0076076	LDHA;PGK1;PDHB;ENO1;TIMP1		KEGG	Prostate cancer_Homo sapiens_hsa05215	0.0201097	0.328292	CCND1;INS
	KEGG	Glucagon signaling pathway_Homo sapiens_hsa04922	0.00625124	0.140781	LDHA;PKM;CALM2		KEGG	cAMP signaling pathway_Homo sapiens_hsa04024	0.000375091	0.00727316	ADCY1;CALM1;SSTR2;CALM2;MLLT4;GRIA4		KEGG	Gastric acid secretion_Homo sapiens_hsa04971	0.000645015	0.0111265	GAST;CALM1;CALM2;ACTB		KEGG	AMPK signaling pathway_Homo sapiens_hsa04152	0.0371049	0.328292	CCND1;INS
	KEGG	HIF-1 signaling pathway_Homo sapiens_hsa04066	0.00659911	0.140781	LDHA;ENO2;INS		KEGG	Dopaminergic synapse_Homo sapiens_hsa04728	0.000376198	0.00727316	GNG3;CALM1;CALM2;ATF4;GRIA4		KEGG	Central carbon metabolism in cancer_Homo sapiens_hsa05230	0.000442035	0.0101668	LDHA;PKM;PDHB;SLC16A3		KEGG	Cell cycle_Homo sapiens_hsa04110	0.0371049	0.328292	CDKN1C;CCND1
	KEGG	Pyruvate metabolism_Homo sapiens_hsa00620	0.00961937	0.175229	LDHA;PKM		KEGG	Aldosterone synthesis and secretion_Homo sapiens_hsa04925	0.000600867	0.00928986	ADCY1;CALM1;CALM2;ATF4		KEGG	Carbon metabolism_Homo sapiens_hsa01200	0.000339088	0.00935883	TPI1;PKM;PGK1;PDHB;ENO1		KEGG	FoxO signaling pathway_Homo sapiens_hsa04068	0.0421239	0.328292	CCND1;INS
	KEGG	AMPK signaling pathway_Homo sapiens_hsa04152	0.0109518	0.175229	CCND1;SCD;INS		KEGG	Adrenergic signaling in cardiomyocytes_Homo sapiens_hsa04261	0.000703852	0.00928986	PPP1R1A;ADCY1;CALM1;CALM2;ATF4		KEGG	Biosynthesis of amino acids_Homo sapiens_hsa01230	0.000645015	0.0111265	TPI1;PKM;PGK1;ENO1		KEGG	Proteoglycans in cancer_Homo sapiens_hsa05205	0.0884289	0.328292	CCND1;IGF2
	KEGG	Type II diabetes mellitus_Homo sapiens_hsa04930	0.0136491	0.194121	PKM;INS		KEGG	Insulin secretion_Homo sapiens_hsa04911	0.000720765	0.00928986	RAB3A;ADCY1;VAMP2;ATF4		KEGG	Pyruvate metabolism_Homo sapiens_hsa00620	0.00123969	0.0190086	LDHA;PKM;PDHB		KEGG	Phenylalanine metabolism_Homo sapiens_hsa00360	0.0408596	0.328292	MIF
	KEGG	Glioma_Homo sapiens_hsa05214	0.0241754	0.204615	CCND1;CALM2		KEGG	GnRH signaling pathway_Homo sapiens_hsa04912	0.000930998	0.0098178	ADCY1;CALM1;CALM2;ATF4		KEGG	Proteoglycans in cancer_Homo sapiens_hsa05205	0.00454094	0.0551775	ITGB1;CCND1;IGF2;PDCD4;ACTB		KEGG	Vitamin digestion and absorption_Homo sapiens_hsa04977	0.0572047	0.328292	APOA1
	KEGG	MicroRNAs in cancer_Homo sapiens_hsa05206	0.024362	0.204615	CCND1;STMN1;FSCN1;VIM		KEGG	Salivary secretion_Homo sapiens_hsa04970	0.000856681	0.0098178	ADCY1;CALM1;CALM2;VAMP2		KEGG	Glioma_Homo sapiens_hsa05214	0.00498058	0.0551775	CCND1;CALM1;CALM2		KEGG	African trypanosomiasis_Homo sapiens_hsa05143	0.08234	0.328292	APOA1
	KEGG	Mineral absorption_Homo sapiens_hsa04978	0.0153184	0.196076	MT1G;FTL		KEGG	Estrogen signaling pathway_Homo sapiens_hsa04915	0.00127397	0.0113667	ADCY1;CALM1;CALM2;ATF4		KEGG	Renin secretion_Homo sapiens_hsa04924	0.00476888	0.0551775	CALM1;CALM2;AGT		KEGG	Tyrosine metabolism_Homo sapiens_hsa00350	0.08234	0.328292	MIF
	KEGG	Pathogenic Escherichia coli infection_Homo sapiens_hsa05130	0.0176731	0.204615	TUBA1A;TUBB		KEGG	Retrograde endocannabinoid signaling_Homo sapiens_hsa04723	0.00137185	0.0113667	GABRB3;GNG3;ADCY1;GRIA4		KEGG	Long-term potentiation_Homo sapiens_hsa04720	0.00519788	0.0551775	PPP1R1A;CALM1;CALM2		KEGG	Maturity onset diabetes of the young_Homo sapiens_hsa04950	0.0618244	0.328292	INS
	KEGG	Long-term potentiation_Homo sapiens_hsa04720	0.0248721	0.204615	PPP1R1A;CALM2		KEGG	Glucagon signaling pathway_Homo sapiens_hsa04922	0.00137185	0.0113667	PKM;CALM1;CALM2;ATF4		KEGG	Oxytocin signaling pathway_Homo sapiens_hsa04921	0.00999068	0.0725639	CCND1;CALM1;CALM2;ACTB		KEGG	Regulation of autophagy_Homo sapiens_hsa04140	0.0913164	0.328292	INS
	KEGG	Prolactin signaling pathway_Homo sapiens_hsa04917	0.0292211	0.205684	CCND1;INS		KEGG	Alcoholism_Homo sapiens_hsa05034	0.00164289	0.012705	GNG3;H2AFJ;CALM1;CALM2;ATF4		KEGG	PPAR signaling pathway_Homo sapiens_hsa03320	0.00588372	0.0579967	SCD;APOA1;APOC3		KEGG	Aldosterone-regulated sodium reabsorption_Homo sapiens_hsa04960	0.0913164	0.328292	INS
	KEGG	Central carbon metabolism in cancer_Homo sapiens_hsa05230	0.0255769	0.204615	LDHA;PKM		KEGG	Renin secretion_Homo sapiens_hsa04924	0.00350783	0.0239358	CALM1;CALM2;AGT		KEGG	Hippo signaling pathway_Homo sapiens_hsa04390	0.00895101	0.070173	MOB1B;CCND1;YWHAQ;ACTB		KEGG	Bladder cancer_Homo sapiens_hsa05219	0.0957723	0.328292	CCND1
	KEGG	Chemokine signaling pathway_Homo sapiens_hsa04062	0.0321381	0.205684	GNG3;CXCL12;ELMO1		KEGG	Ribosome_Homo sapiens_hsa03010	0.00414549	0.026476	RPS29;RPL23;RPLP2;RPS11		KEGG	Pertussis_Homo sapiens_hsa05133	0.00741152	0.068186	ITGB1;CALM1;CALM2		KEGG	Type II diabetes mellitus_Homo sapiens_hsa04930	0.1112	0.328292	INS
	KEGG	Gastric acid secretion_Homo sapiens_hsa04971	0.0307335	0.205684	GAST;CALM2		KEGG	cGMP-PKG signaling pathway_Homo sapiens_hsa04022	0.00828638	0.0448906	ADCY1;CALM1;CALM2;ATF4		KEGG	Phagosome_Homo sapiens_hsa04145	0.009153	0.070173	ITGB1;ATP6V0B;TUBA1A;ACTB		KEGG	Ovarian steroidogenesis_Homo sapiens_hsa04913	0.11556	0.328292	INS
	KEGG	Synaptic vesicle cycle_Homo sapiens_hsa04721	0.0228069	0.204615	RAB3A;VAMP2		KEGG	Synaptic vesicle cycle_Homo sapiens_hsa04721	0.00335484	0.0239358	ATP6V0B;RAB3A;VAMP2		KEGG	Protein processing in endoplasmic reticulum_Homo sapiens_hsa04141	0.0125463	0.0865696	PDIA3;RPN2;MAN1A1;PDIA6		KEGG	Non-small cell lung cancer_Homo sapiens_hsa05223	0.128516	0.328292	CCND1
	KEGG	Biosynthesis of amino acids_Homo sapiens_hsa01230	0.0307335	0.205684	PKM;ENO2		KEGG	PPAR signaling pathway_Homo sapiens_hsa03320	0.00433658	0.026476	SCD;APOA1;APOC3		KEGG	Circadian entrainment_Homo sapiens_hsa04713	0.0140811	0.0912188	GNG3;CALM1;CALM2		KEGG	Endometrial cancer_Homo sapiens_hsa05213	0.1199	0.328292	CCND1
	KEGG	Prostate cancer_Homo sapiens_hsa05215	0.0430141	0.239383	CCND1;INS		KEGG	Inflammatory mediator regulation of TRP channels_Homo sapiens_hsa04750	0.0114064	0.0551308	ADCY1;CALM1;CALM2		KEGG	Alcoholism_Homo sapiens_hsa05034	0.0152031	0.0912188	GNG3;H2AFJ;CALM1;CALM2		KEGG	Fat digestion and absorption_Homo sapiens_hsa04975	0.0957723	0.328292	APOA1
	KEGG	Ras signaling pathway_Homo sapiens_hsa04014	0.0519909	0.266194	GNG3;CALM2;INS		KEGG	GABAergic synapse_Homo sapiens_hsa04727	0.00851373	0.0448906	GABRB3;GNG3;ADCY1		KEGG	Tuberculosis_Homo sapiens_hsa05152	0.0149228	0.0912188	CD74;ATP6V0B;CALM1;CALM2		KEGG	Type I diabetes mellitus_Homo sapiens_hsa04940	0.100207	0.328292	INS
	KEGG	Circadian entrainment_Homo sapiens_hsa04713	0.0483593	0.257916	GNG3;CALM2		KEGG	Morphine addiction_Homo sapiens_hsa05032	0.0093297	0.0470542	GABRB3;GNG3;ADCY1		KEGG	Rap1 signaling pathway_Homo sapiens_hsa04015	0.0259809	0.137199	ITGB1;CALM1;CALM2;ACTB		KEGG	Regulation of lipolysis in adipocytes_Homo sapiens_hsa04923	0.128516	0.328292	INS
	KEGG	Gap junction_Homo sapiens_hsa04540	0.0421463	0.239383	TUBA1A;TUBB		KEGG	Melanogenesis_Homo sapiens_hsa04916	0.0120447	0.0558873	ADCY1;CALM1;CALM2		KEGG	Neurotrophin signaling pathway_Homo sapiens_hsa04722	0.0259961	0.137199	MAGED1;CALM1;CALM2		KEGG	Acute myeloid leukemia_Homo sapiens_hsa05221	0.130657	0.328292	CCND1
	KEGG	Salivary secretion_Homo sapiens_hsa04970	0.0430141	0.239383	CALM2;VAMP2		KEGG	Cholinergic synapse_Homo sapiens_hsa04725	0.0159186	0.068391	GNG3;ADCY1;ATF4		KEGG	Oocyte meiosis_Homo sapiens_hsa04114	0.0276978	0.137199	YWHAQ;CALM1;CALM2		KEGG	mTOR signaling pathway_Homo sapiens_hsa04150	0.13705	0.328292	INS
	KEGG	Cholinergic synapse_Homo sapiens_hsa04725	0.0636948	0.311535	ACHE;GNG3		KEGG	Rap1 signaling pathway_Homo sapiens_hsa04015	0.0181901	0.0727604	ADCY1;CALM1;CALM2;MLLT4		KEGG	Leukocyte transendothelial migration_Homo sapiens_hsa04670	0.024894	0.137199	ITGB1;CLDN7;ACTB		KEGG	Glioma_Homo sapiens_hsa05214	0.147602	0.328292	CCND1
	KEGG	Oocyte meiosis_Homo sapiens_hsa04114	0.0761243	0.347997	CALM2;INS		KEGG	Glutamatergic synapse_Homo sapiens_hsa04724	0.0170828	0.0707718	GNG3;ADCY1;GRIA4		KEGG	Dopaminergic synapse_Homo sapiens_hsa04728	0.0312754	0.143867	GNG3;CALM1;CALM2		KEGG	Mineral absorption_Homo sapiens_hsa04978	0.117733	0.328292	MT1G
	KEGG	Carbon metabolism_Homo sapiens_hsa01200	0.0657144	0.311535	PKM;ENO2		KEGG	Ras signaling pathway_Homo sapiens_hsa04014	0.0230694	0.0810925	GNG3;CALM1;CALM2;MLLT4		KEGG	Phototransduction_Homo sapiens_hsa04744	0.00895854	0.070173	CALM1;CALM2		KEGG	MicroRNAs in cancer_Homo sapiens_hsa05206	0.164619	0.328292	CCND1;VIM
	KEGG	Dopaminergic synapse_Homo sapiens_hsa04728	0.0826055	0.348071	GNG3;CALM2		KEGG	Neurotrophin signaling pathway_Homo sapiens_hsa04722	0.0195511	0.0731589	CALM1;CALM2;ATF4		KEGG	Adrenergic signaling in cardiomyocytes_Homo sapiens_hsa04261	0.0441181	0.190259	PPP1R1A;CALM1;CALM2		KEGG	Colorectal cancer_Homo sapiens_hsa05210	0.141286	0.328292	CCND1
	KEGG	FoxO signaling pathway_Homo sapiens_hsa04068	0.0870178	0.348071	CCND1;INS		KEGG	Vascular smooth muscle contraction_Homo sapiens_hsa04270	0.0195511	0.0731589	ADCY1;CALM1;CALM2		KEGG	Metabolic pathways_Homo sapiens_hsa01100	0.0638078	0.234005	LDHA;ATP6V0B;TPI1;PKM;RPN2;GPAA1;PGK1;MAN1A1;ENO1;PDHB;SAT1		KEGG	Longevity regulating pathway - multiple species_Homo sapiens_hsa04213	0.145501	0.328292	INS
	KEGG	Insulin signaling pathway_Homo sapiens_hsa04910	0.093766	0.358772	CALM2;INS		KEGG	Oocyte meiosis_Homo sapiens_hsa04114	0.0208553	0.0756004	ADCY1;CALM1;CALM2		KEGG	Vibrio cholerae infection_Homo sapiens_hsa05110	0.0299762	0.142645	ATP6V0B;ACTB		KEGG	Viral myocarditis_Homo sapiens_hsa05416	0.134924	0.328292	CCND1
	KEGG	Adrenergic signaling in cardiomyocytes_Homo sapiens_hsa04261	0.104161	0.370349	PPP1R1A;CALM2		KEGG	Oxytocin signaling pathway_Homo sapiens_hsa04921	0.0395179	0.130973	ADCY1;CALM1;CALM2		KEGG	Amphetamine addiction_Homo sapiens_hsa05031	0.0492355	0.199838	CALM1;CALM2		KEGG	Pancreatic cancer_Homo sapiens_hsa05212	0.149697	0.328292	CCND1
	KEGG	Oxytocin signaling pathway_Homo sapiens_hsa04921	0.11606	0.371117	CCND1;CALM2		KEGG	Calcium signaling pathway_Homo sapiens_hsa04020	0.0544225	0.157825	ADCY1;CALM1;CALM2		KEGG	Viral myocarditis_Homo sapiens_hsa05416	0.0391478	0.174271	CCND1;ACTB		KEGG	PI3K-Akt signaling pathway_Homo sapiens_hsa04151	0.203396	0.345423	CCND1;INS
	KEGG	PI3K-Akt signaling pathway_Homo sapiens_hsa04151	0.1324	0.371117	GNG3;CCND1;INS		KEGG	Glioma_Homo sapiens_hsa05214	0.0382703	0.130569	CALM1;CALM2		KEGG	Aldosterone synthesis and secretion_Homo sapiens_hsa04925	0.0688238	0.24353	CALM1;CALM2		KEGG	Melanoma_Homo sapiens_hsa05218	0.160097	0.328292	CCND1
	KEGG	Phagosome_Homo sapiens_hsa04145	0.111259	0.371117	TUBA1A;TUBB		KEGG	Phototransduction_Homo sapiens_hsa04744	0.00725354	0.0420705	CALM1;CALM2		KEGG	N-Glycan biosynthesis_Homo sapiens_hsa00510	0.0278376	0.137199	RPN2;MAN1A1		KEGG	Long-term potentiation_Homo sapiens_hsa04720	0.149697	0.328292	PPP1R1A
	KEGG	cGMP-PKG signaling pathway_Homo sapiens_hsa04022	0.12705	0.371117	CALM2;INS		KEGG	Tuberculosis_Homo sapiens_hsa05152	0.05297	0.157825	ATP6V0B;CALM1;CALM2		KEGG	Arrhythmogenic right ventricular cardiomyopathy (ARVC)_Homo sapiens_hsa05412	0.0587423	0.231612	ITGB1;ACTB		KEGG	Chronic myeloid leukemia_Homo sapiens_hsa05220	0.164223	0.328292	CCND1
	KEGG	Tuberculosis_Homo sapiens_hsa05152	0.140802	0.371117	CD74;CALM2		KEGG	Nicotine addiction_Homo sapiens_hsa05033	0.0154882	0.068391	GABRB3;GRIA4		KEGG	Focal adhesion_Homo sapiens_hsa04510	0.0923141	0.261233	ITGB1;CCND1;ACTB		KEGG	Gastric acid secretion_Homo sapiens_hsa04971	0.166278	0.328292	GAST
	KEGG	Alcoholism_Homo sapiens_hsa05034	0.142068	0.371117	GNG3;CALM2		KEGG	Thyroid hormone synthesis_Homo sapiens_hsa04918	0.0448978	0.144671	ADCY1;ATF4		KEGG	Shigellosis_Homo sapiens_hsa05131	0.0466328	0.19501	ITGB1;ACTB		KEGG	Shigellosis_Homo sapiens_hsa05131	0.147602	0.328292	ELMO1
	KEGG	Proteoglycans in cancer_Homo sapiens_hsa05205	0.173122	0.381309	CCND1;IGF2		KEGG	Longevity regulating pathway - mammal_Homo sapiens_hsa04211	0.0736827	0.208468	ADCY1;ATF4		KEGG	Antigen processing and presentation_Homo sapiens_hsa04612	0.0629958	0.234005	PDIA3;CD74		KEGG	p53 signaling pathway_Homo sapiens_hsa04115	0.155952	0.328292	CCND1
	KEGG	Pathways in cancer_Homo sapiens_hsa05200	0.181793	0.381334	GNG3;CXCL12;CCND1		KEGG	Phosphatidylinositol signaling system_Homo sapiens_hsa04070	0.0791668	0.218651	CALM1;CALM2		KEGG	Bacterial invasion of epithelial cells_Homo sapiens_hsa05100	0.0644363	0.234005	ITGB1;ACTB		KEGG	TGF-beta signaling pathway_Homo sapiens_hsa04350	0.186559	0.34123	INHBA
	KEGG	Viral carcinogenesis_Homo sapiens_hsa05203	0.17576	0.381309	PKM;CCND1		KEGG	Pertussis_Homo sapiens_hsa05133	0.0495342	0.155296	CALM1;CALM2		KEGG	Viral carcinogenesis_Homo sapiens_hsa05203	0.0954501	0.261233	PKM;CCND1;YWHAQ		KEGG	AGE-RAGE signaling pathway in diabetic complications_Homo sapiens_hsa04933	0.219933	0.351639	CCND1
	KEGG	Rap1 signaling pathway_Homo sapiens_hsa04015	0.183713	0.381334	CALM2;INS		KEGG	Complement and coagulation cascades_Homo sapiens_hsa04610	0.0543357	0.157825	SERPINA1;SERPINF2		KEGG	Small cell lung cancer_Homo sapiens_hsa05222	0.076347	0.252352	ITGB1;CCND1		KEGG	Insulin secretion_Homo sapiens_hsa04911	0.18856	0.34123	INS
	KEGG	Metabolic pathways_Homo sapiens_hsa01100	0.844944	0.844944	LDHA;PKM;ENO2		KEGG	Serotonergic synapse_Homo sapiens_hsa04726	0.0992926	0.26733	GABRB3;GNG3		KEGG	GABAergic synapse_Homo sapiens_hsa04727	0.0794264	0.252352	GABRB3;GNG3		KEGG	Pathways in cancer_Homo sapiens_hsa05200	0.254045	0.376182	TFG;CCND1
	KEGG	Olfactory transduction_Homo sapiens_hsa04740	0.78871	0.79492	CALM2		KEGG	Lysosome_Homo sapiens_hsa04142	0.115994	0.270296	ATP6V0B;NPC2		KEGG	GnRH signaling pathway_Homo sapiens_hsa04912	0.0841172	0.252352	CALM1;CALM2		KEGG	Progesterone-mediated oocyte maturation_Homo sapiens_hsa04914	0.214143	0.35083	INS
	KEGG	Cytokine-cytokine receptor interaction_Homo sapiens_hsa04060	0.628004	0.637972	CXCL12		KEGG	Leukocyte transendothelial migration_Homo sapiens_hsa04670	0.108315	0.26733	CLDN7;MLLT4		KEGG	PI3K-Akt signaling pathway_Homo sapiens_hsa04151	0.107701	0.275236	ITGB1;GNG3;CCND1;YWHAQ		KEGG	Bacterial invasion of epithelial cells_Homo sapiens_hsa05100	0.174449	0.335814	ELMO1
	KEGG	Thyroid cancer_Homo sapiens_hsa05216	0.10199	0.370349	CCND1		KEGG	Neuroactive ligand-receptor interaction_Homo sapiens_hsa04080	0.145026	0.305872	GABRB3;SSTR2;GRIA4		KEGG	Salivary secretion_Homo sapiens_hsa04970	0.0809806	0.252352	CALM1;CALM2		KEGG	Arrhythmogenic right ventricular cardiomyopathy (ARVC)_Homo sapiens_hsa05412	0.166278	0.328292	DSG2
	KEGG	MAPK signaling pathway_Homo sapiens_hsa04010	0.613767	0.632928	STMN1		KEGG	Hepatitis C_Homo sapiens_hsa05160	0.131746	0.297132	CD81;CLDN7		KEGG	Hypertrophic cardiomyopathy (HCM)_Homo sapiens_hsa05410	0.0718023	0.247718	ITGB1;ACTB		KEGG	Longevity regulating pathway - mammal_Homo sapiens_hsa04211	0.206357	0.345423	INS
	KEGG	HTLV-I infection_Homo sapiens_hsa05166	0.618094	0.632928	CCND1		KEGG	Insulin signaling pathway_Homo sapiens_hsa04910	0.141422	0.303795	CALM1;CALM2		KEGG	Inflammatory mediator regulation of TRP channels_Homo sapiens_hsa04750	0.095377	0.261233	CALM1;CALM2		KEGG	Small cell lung cancer_Homo sapiens_hsa05222	0.190557	0.34123	CCND1
	KEGG	Epstein-Barr virus infection_Homo sapiens_hsa05169	0.528851	0.55486	VIM		KEGG	Tight junction_Homo sapiens_hsa04530	0.141422	0.303795	CLDN7;MLLT4		KEGG	Dilated cardiomyopathy_Homo sapiens_hsa05414	0.0825443	0.252352	ITGB1;ACTB		KEGG	HIF-1 signaling pathway_Homo sapiens_hsa04066	0.22377	0.351639	INS
	KEGG	Regulation of actin cytoskeleton_Homo sapiens_hsa04810	0.54956	0.5719	INS		KEGG	Non-alcoholic fatty liver disease (NAFLD)_Homo sapiens_hsa04932	0.161201	0.322402	MLXIPL;ATF4		KEGG	Morphine addiction_Homo sapiens_hsa05032	0.0841172	0.252352	GABRB3;GNG3		KEGG	Insulin resistance_Homo sapiens_hsa04931	0.235171	0.362163	INS
	KEGG	Calcium signaling pathway_Homo sapiens_hsa04020	0.488417	0.529808	CALM2		KEGG	Protein processing in endoplasmic reticulum_Homo sapiens_hsa04141	0.191715	0.338331	MAN1A1;ATF4		KEGG	Estrogen signaling pathway_Homo sapiens_hsa04915	0.0970195	0.261233	CALM1;CALM2		KEGG	Thyroid hormone signaling pathway_Homo sapiens_hsa04919	0.251965	0.376182	CCND1
	KEGG	Purine metabolism_Homo sapiens_hsa00230	0.480706	0.5259	PKM		KEGG	Alzheimer's disease_Homo sapiens_hsa05010	0.189998	0.338331	CALM1;CALM2		KEGG	Phosphatidylinositol signaling system_Homo sapiens_hsa04070	0.095377	0.261233	CALM1;CALM2		KEGG	Protein digestion and absorption_Homo sapiens_hsa04974	0.198495	0.345423	COL18A1
	KEGG	Focal adhesion_Homo sapiens_hsa04510	0.528851	0.55486	CCND1		KEGG	Purine metabolism_Homo sapiens_hsa00230	0.203786	0.338331	PKM;ADCY1		KEGG	Melanogenesis_Homo sapiens_hsa04916	0.09867	0.261233	CALM1;CALM2		KEGG	Oocyte meiosis_Homo sapiens_hsa04114	0.261139	0.37939	INS
	KEGG	Progesterone-mediated oocyte maturation_Homo sapiens_hsa04914	0.305219	0.408738	INS		KEGG	Viral carcinogenesis_Homo sapiens_hsa05203	0.254499	0.378486	PKM;ATF4		KEGG	Ras signaling pathway_Homo sapiens_hsa04014	0.119724	0.280222	GNG3;CALM1;CALM2		KEGG	Measles_Homo sapiens_hsa05162	0.284477	0.381846	CCND1
	KEGG	Herpes simplex infection_Homo sapiens_hsa05168	0.497897	0.535553	CD74		KEGG	Chemokine signaling pathway_Homo sapiens_hsa04062	0.222919	0.340245	GNG3;ADCY1		KEGG	Retrograde endocannabinoid signaling_Homo sapiens_hsa04723	0.100329	0.261233	GABRB3;GNG3		KEGG	Wnt signaling pathway_Homo sapiens_hsa04310	0.295003	0.381846	CCND1
	KEGG	cAMP signaling pathway_Homo sapiens_hsa04024	0.523529	0.55486	CALM2		KEGG	HTLV-I infection_Homo sapiens_hsa05166	0.347276	0.440233	ADCY1;ATF4		KEGG	Serotonergic synapse_Homo sapiens_hsa04726	0.119062	0.280222	GABRB3;GNG3		KEGG	Systemic lupus erythematosus_Homo sapiens_hsa05322	0.282708	0.381846	H3F3B
	KEGG	Apoptosis_Homo sapiens_hsa04210	0.405941	0.476701	TUBA1A		KEGG	MAPK signaling pathway_Homo sapiens_hsa04010	0.705339	0.705339	ATF4		KEGG	Platelet activation_Homo sapiens_hsa04611	0.136778	0.293541	ITGB1;ACTB		KEGG	Insulin signaling pathway_Homo sapiens_hsa04910	0.289759	0.381846	INS
	KEGG	GnRH signaling pathway_Homo sapiens_hsa04912	0.286867	0.408738	CALM2		KEGG	Olfactory transduction_Homo sapiens_hsa04740	0.58958	0.599924	CALM1;CALM2		KEGG	Thyroid hormone signaling pathway_Homo sapiens_hsa04919	0.129621	0.288511	CCND1;ACTB		KEGG	Hepatitis B_Homo sapiens_hsa05161	0.301936	0.381846	CCND1
	KEGG	Regulation of lipolysis in adipocytes_Homo sapiens_hsa04923	0.187688	0.381334	INS		KEGG	Proteoglycans in cancer_Homo sapiens_hsa05205	0.621475	0.626879	IGF2		KEGG	Vascular smooth muscle contraction_Homo sapiens_hsa04270	0.133188	0.291746	CALM1;CALM2		KEGG	Phospholipase D signaling pathway_Homo sapiens_hsa04072	0.298478	0.381846	INS
	KEGG	Chronic myeloid leukemia_Homo sapiens_hsa05220	0.237452	0.394726	CCND1		KEGG	PI3K-Akt signaling pathway_Homo sapiens_hsa04151	0.483598	0.53375	GNG3;ATF4		KEGG	AMPK signaling pathway_Homo sapiens_hsa04152	0.140389	0.293541	CCND1;SCD		KEGG	Signaling pathways regulating pluripotency of stem cells_Homo sapiens_hsa04550	0.295003	0.381846	INHBA
	KEGG	Endometrial cancer_Homo sapiens_hsa05213	0.175521	0.381309	CCND1		KEGG	Metabolic pathways_Homo sapiens_hsa01100	0.540692	0.560003	ACLY;ATP6V0B;PKM;GPAA1;MAN1A1;PLD3		KEGG	Cell cycle_Homo sapiens_hsa04110	0.140389	0.293541	CCND1;YWHAQ		KEGG	Non-alcoholic fatty liver disease (NAFLD)_Homo sapiens_hsa04932	0.310509	0.381846	INS
	KEGG	Hepatitis B_Homo sapiens_hsa05161	0.4191	0.478972	CCND1		KEGG	Pathways in cancer_Homo sapiens_hsa05200	0.565325	0.580333	GNG3;ADCY1		KEGG	Hepatitis C_Homo sapiens_hsa05160	0.156883	0.304928	CD81;CLDN7		KEGG	Adrenergic signaling in cardiomyocytes_Homo sapiens_hsa04261	0.305378	0.381846	PPP1R1A
	KEGG	Measles_Homo sapiens_hsa05162	0.397005	0.470524	CCND1		KEGG	Apoptosis_Homo sapiens_hsa04210	0.487737	0.53375	ATF4		KEGG	Apoptosis_Homo sapiens_hsa04210	0.169955	0.308602	TUBA1A;ACTB		KEGG	Oxytocin signaling pathway_Homo sapiens_hsa04921	0.322338	0.381846	CCND1
	KEGG	Jak-STAT signaling pathway_Homo sapiens_hsa04630	0.444563	0.494818	CCND1		KEGG	Hepatitis B_Homo sapiens_hsa05161	0.502267	0.534522	ATF4		KEGG	Ribosome_Homo sapiens_hsa03010	0.164329	0.308602	RPS29;RPS11		KEGG	Jak-STAT signaling pathway_Homo sapiens_hsa04630	0.322338	0.381846	CCND1
	KEGG	Non-alcoholic fatty liver disease (NAFLD)_Homo sapiens_hsa04932	0.429847	0.486906	INS		KEGG	Phospholipase D signaling pathway_Homo sapiens_hsa04072	0.497469	0.534319	ADCY1		KEGG	Insulin signaling pathway_Homo sapiens_hsa04910	0.168076	0.308602	CALM1;CALM2		KEGG	Hippo signaling pathway_Homo sapiens_hsa04390	0.313909	0.381846	CCND1
	KEGG	Wnt signaling pathway_Homo sapiens_hsa04310	0.410359	0.477509	CCND1		KEGG	Hippo signaling pathway_Homo sapiens_hsa04390	0.518703	0.544475	MOB1B		KEGG	Hepatitis B_Homo sapiens_hsa05161	0.181301	0.320763	CCND1;YWHAQ		KEGG	cGMP-PKG signaling pathway_Homo sapiens_hsa04022	0.337254	0.393463	INS
	KEGG	Alzheimer's disease_Homo sapiens_hsa05010	0.464938	0.513035	CALM2		KEGG	Cell adhesion molecules (CAMs)_Homo sapiens_hsa04514	0.492626	0.534062	CLDN7		KEGG	Tight junction_Homo sapiens_hsa04530	0.168076	0.308602	CLDN7;ACTB		KEGG	Alcoholism_Homo sapiens_hsa05034	0.356643	0.405647	H3F3B
	KEGG	Phospholipase D signaling pathway_Homo sapiens_hsa04072	0.414746	0.478266	INS		KEGG	Platelet activation_Homo sapiens_hsa04611	0.441583	0.507165	ADCY1		KEGG	MicroRNAs in cancer_Homo sapiens_hsa05206	0.20884	0.351463	CCND1;PDCD4;VIM		KEGG	Epstein-Barr virus infection_Homo sapiens_hsa05169	0.392265	0.42432	VIM
	KEGG	mTOR signaling pathway_Homo sapiens_hsa04150	0.199678	0.387254	INS		KEGG	Phagosome_Homo sapiens_hsa04145	0.521007	0.544475	ATP6V0B		KEGG	Cell adhesion molecules (CAMs)_Homo sapiens_hsa04514	0.173723	0.311348	ITGB1;CLDN7		KEGG	Transcriptional misregulation in cancer_Homo sapiens_hsa05202	0.358234	0.405647	H3F3B
	KEGG	Insulin resistance_Homo sapiens_hsa04931	0.33312	0.4307	INS		KEGG	Oxidative phosphorylation_Homo sapiens_hsa00190	0.470255	0.529607	ATP6V0B		KEGG	cGMP-PKG signaling pathway_Homo sapiens_hsa04022	0.22177	0.357493	CALM1;CALM2		KEGG	Chemokine signaling pathway_Homo sapiens_hsa04062	0.36926	0.412072	ELMO1
	KEGG	Longevity regulating pathway - mammal_Homo sapiens_hsa04211	0.29479	0.408738	INS		KEGG	Systemic lupus erythematosus_Homo sapiens_hsa05322	0.475309	0.530152	H2AFJ		KEGG	Neuroactive ligand-receptor interaction_Homo sapiens_hsa04080	0.772881	0.772881	GABRB3		KEGG	Viral carcinogenesis_Homo sapiens_hsa05203	0.396767	0.42432	CCND1
	KEGG	Melanoma_Homo sapiens_hsa05218	0.231757	0.394726	CCND1		KEGG	AMPK signaling pathway_Homo sapiens_hsa04152	0.446908	0.508248	SCD		KEGG	Alzheimer's disease_Homo sapiens_hsa05010	0.223719	0.357493	CALM1;CALM2		KEGG	Focal adhesion_Homo sapiens_hsa04510	0.392265	0.42432	CCND1
	KEGG	Hippo signaling pathway_Homo sapiens_hsa04390	0.43409	0.487399	CCND1		KEGG	Insulin resistance_Homo sapiens_hsa04931	0.405713	0.478707	MLXIPL		KEGG	HTLV-I infection_Homo sapiens_hsa05166	0.748408	0.753871	CCND1		KEGG	Rap1 signaling pathway_Homo sapiens_hsa04015	0.405672	0.426701	INS
	KEGG	Morphine addiction_Homo sapiens_hsa05032	0.286867	0.408738	GNG3		KEGG	TNF signaling pathway_Homo sapiens_hsa04668	0.408552	0.478707	ATF4		KEGG	Calcium signaling pathway_Homo sapiens_hsa04020	0.247191	0.370786	CALM1;CALM2		KEGG	Regulation of actin cytoskeleton_Homo sapiens_hsa04810	0.410076	0.426701	INS
	KEGG	AGE-RAGE signaling pathway in diabetic complications_Homo sapiens_hsa04933	0.31294	0.408738	CCND1		KEGG	Progesterone-mediated oocyte maturation_Homo sapiens_hsa04914	0.373588	0.456171	ADCY1		KEGG	Olfactory transduction_Homo sapiens_hsa04740	0.649144	0.65869	CALM1;CALM2		KEGG	Ras signaling pathway_Homo sapiens_hsa04014	0.428795	0.440229	INS
	KEGG	Rheumatoid arthritis_Homo sapiens_hsa05323	0.284206	0.408738	CXCL12		KEGG	Chagas disease (American trypanosomiasis)_Homo sapiens_hsa05142	0.391318	0.467968	ADCY1		KEGG	Epstein-Barr virus infection_Homo sapiens_hsa05169	0.29038	0.408903	YWHAQ;VIM		KEGG	HTLV-I infection_Homo sapiens_hsa05166	0.471114	0.477313	CCND1
	KEGG	Inflammatory mediator regulation of TRP channels_Homo sapiens_hsa04750	0.305219	0.408738	CALM2		KEGG	Prostate cancer_Homo sapiens_hsa05215	0.34603	0.440233	ATF4		KEGG	cAMP signaling pathway_Homo sapiens_hsa04024	0.284495	0.405298	CALM1;CALM2		KEGG	Cytokine-cytokine receptor interaction_Homo sapiens_hsa04060	0.480236	0.480236	INHBA
	KEGG	Estrogen signaling pathway_Homo sapiens_hsa04915	0.307802	0.408738	CALM2		KEGG	Carbon metabolism_Homo sapiens_hsa01200	0.416986	0.483704	PKM		KEGG	Herpes simplex infection_Homo sapiens_hsa05168	0.627557	0.645565	CD74		GO_BP	rhodopsin metabolic process (GO:0046154)	9.48785e-05	0.0240883	TTR;IGFBP5;IGF2;APOA1;INS
	KEGG	Aldosterone synthesis and secretion_Homo sapiens_hsa04925	0.259818	0.404924	CALM2		KEGG	Amoebiasis_Homo sapiens_hsa05146	0.379554	0.458628	ADCY1		KEGG	Regulation of actin cytoskeleton_Homo sapiens_hsa04810	0.313853	0.411464	ITGB1;ACTB		GO_BP	prosthetic group metabolic process (GO:0051189)	9.48785e-05	0.0240883	TTR;IGFBP5;IGF2;APOA1;INS
	KEGG	Glutamatergic synapse_Homo sapiens_hsa04724	0.345434	0.437778	GNG3		KEGG	Glycerophospholipid metabolism_Homo sapiens_hsa00564	0.364532	0.453591	PLD3		KEGG	Purine metabolism_Homo sapiens_hsa00230	0.609141	0.632041	PKM		GO_BP	ferredoxin metabolic process (GO:0006124)	9.48785e-05	0.0240883	TTR;IGFBP5;IGF2;APOA1;INS
	KEGG	Aldosterone-regulated sodium reabsorption_Homo sapiens_hsa04960	0.134723	0.371117	INS		KEGG	Gap junction_Homo sapiens_hsa04540	0.342895	0.440233	ADCY1		KEGG	Influenza A_Homo sapiens_hsa05164	0.60704	0.632041	ACTB		GO_BP	cellular protein metabolic process (GO:0044267)	9.48785e-05	0.0240883	TTR;IGFBP5;IGF2;APOA1;INS
	KEGG	Neurotrophin signaling pathway_Homo sapiens_hsa04722	0.359915	0.438754	CALM2		KEGG	Pancreatic secretion_Homo sapiens_hsa04972	0.367565	0.453591	ADCY1		KEGG	Chemokine signaling pathway_Homo sapiens_hsa04062	0.631531	0.645565	GNG3		GO_BP	protein repair (GO:0030091)	0.000109987	0.0240883	TTR;IGFBP5;IGF2;APOA1;INS
	KEGG	GABAergic synapse_Homo sapiens_hsa04727	0.278856	0.408738	GNG3		KEGG	Rheumatoid arthritis_Homo sapiens_hsa05323	0.349151	0.440233	ATP6V0B		KEGG	Jak-STAT signaling pathway_Homo sapiens_hsa04630	0.569561	0.599995	CCND1		GO_BP	CAAX-box protein maturation (GO:0080120)	0.000115413	0.0240883	TTR;IGFBP5;IGF2;APOA1;INS
	KEGG	Melanogenesis_Homo sapiens_hsa04916	0.310376	0.408738	CALM2		KEGG	Dilated cardiomyopathy_Homo sapiens_hsa05414	0.349151	0.440233	ADCY1		KEGG	Wnt signaling pathway_Homo sapiens_hsa04310	0.53106	0.563741	CCND1		GO_BP	Notch receptor processing (GO:0007220)	0.000132931	0.0242766	TTR;IGFBP5;IGF2;APOA1;INS
	KEGG	Longevity regulating pathway - multiple species_Homo sapiens_hsa04213	0.211493	0.390955	INS		KEGG	B cell receptor signaling pathway_Homo sapiens_hsa04662	0.294046	0.396548	CD81		KEGG	Pathways in cancer_Homo sapiens_hsa05200	0.351811	0.432072	ITGB1;GNG3;CCND1		GO_BP	cellular protein catabolic process (GO:0044257)	0.000181728	0.0295005	TTR;IGFBP5;IGF2;APOA1;INS
	KEGG	Pancreatic cancer_Homo sapiens_hsa05212	0.217336	0.390955	CCND1		KEGG	Central carbon metabolism in cancer_Homo sapiens_hsa05230	0.273515	0.3917	PKM		KEGG	Measles_Homo sapiens_hsa05162	0.51576	0.551743	CCND1		GO_BP	mitochondrial protein processing (GO:0034982)	0.00025817	0.0333435	TTR;IGFBP5;IGF2;APOA1;INS
	KEGG	Thyroid hormone signaling pathway_Homo sapiens_hsa04919	0.355124	0.438754	CCND1		KEGG	Biosynthesis of amino acids_Homo sapiens_hsa01230	0.297411	0.396548	PKM		KEGG	FoxO signaling pathway_Homo sapiens_hsa04068	0.507925	0.551743	CCND1		GO_BP	sterol regulatory element binding protein cleavage (GO:0035103)	0.000273869	0.0333435	TTR;IGFBP5;IGF2;APOA1;INS
	KEGG	RNA degradation_Homo sapiens_hsa03018	0.248717	0.397444	ENO2		KEGG	Adherens junction_Homo sapiens_hsa04520	0.297411	0.396548	MLLT4		KEGG	Systemic lupus erythematosus_Homo sapiens_hsa05322	0.513162	0.551743	H2AFJ		GO_BP	vacuolar protein processing (GO:0006624)	0.00025817	0.0333435	TTR;IGFBP5;IGF2;APOA1;INS
	KEGG	Phosphatidylinositol signaling system_Homo sapiens_hsa04070	0.305219	0.408738	CALM2		KEGG	Bile secretion_Homo sapiens_hsa04976	0.287267	0.396548	ADCY1		KEGG	Oxidative phosphorylation_Homo sapiens_hsa00190	0.507925	0.551743	ATP6V0B		GO_BP	cellular protein modification process (GO:0006464)	0.000515734	0.047093	TTR;IGFBP5;IGF2;APOA1;INS
	KEGG	Ovarian steroidogenesis_Homo sapiens_hsa04913	0.16937	0.381309	INS		KEGG	Longevity regulating pathway - multiple species_Homo sapiens_hsa04213	0.263029	0.386219	ADCY1		KEGG	Lysosome_Homo sapiens_hsa04142	0.480891	0.535185	ATP6V0B		GO_BP	signal peptide processing (GO:0006465)	0.000356944	0.0372497	TTR;IGFBP5;IGF2;APOA1;INS
	KEGG	NF-kappa B signaling pathway_Homo sapiens_hsa04064	0.292158	0.408738	CXCL12		KEGG	Epithelial cell signaling in Helicobacter pylori infection_Homo sapiens_hsa05120	0.276977	0.391821	ATP6V0B		KEGG	Axon guidance_Homo sapiens_hsa04360	0.491876	0.543032	ITGB1		GO_BP	translation (GO:0006412)	0.00157739	0.0521259	TTR;IGFBP5;IGF2;APOA1;INS
	KEGG	Glycerophospholipid metabolism_Homo sapiens_hsa00564	0.297411	0.408738	ACHE		KEGG	Arrhythmogenic right ventricular cardiomyopathy (ARVC)_Homo sapiens_hsa05412	0.297411	0.396548	DSP		KEGG	Glutamatergic synapse_Homo sapiens_hsa04724	0.455305	0.515017	GNG3		GO_BP	positive regulation of peptidyl-tyrosine phosphorylation (GO:0050731)	0.000775112	0.0518755	CCND1;IGF2;MIF;INS
	KEGG	Small cell lung cancer_Homo sapiens_hsa05222	0.273467	0.408738	CCND1		KEGG	Glycolysis / Gluconeogenesis_Homo sapiens_hsa00010	0.273515	0.3917	PKM		KEGG	Cholinergic synapse_Homo sapiens_hsa04725	0.446502	0.509234	GNG3		GO_BP	positive regulation of MAPK cascade (GO:0043410)	0.00129301	0.0521259	CCND1;IGF2;INHBA;INS
	KEGG	Serotonergic synapse_Homo sapiens_hsa04726	0.340535	0.435885	GNG3		KEGG	Regulation of lipolysis in adipocytes_Homo sapiens_hsa04923	0.234328	0.353014	ADCY1		KEGG	Toxoplasmosis_Homo sapiens_hsa05145	0.466827	0.523757	ITGB1		GO_BP	negative regulation of plasma cell differentiation (GO:1900099)	0.000318887	0.035838	AMBP;INHBA
	KEGG	Cell cycle_Homo sapiens_hsa04110	0.369393	0.44606	CCND1		KEGG	Malaria_Homo sapiens_hsa05144	0.20831	0.338331	CD81		KEGG	AGE-RAGE signaling pathway in diabetic complications_Homo sapiens_hsa04933	0.416128	0.478547	CCND1		GO_BP	positive regulation of peptidyl-tyrosine autophosphorylation (GO:1900086)	0.000761934	0.0518755	IGF2;MIF;INS
	KEGG	Leukocyte transendothelial migration_Homo sapiens_hsa04670	0.355124	0.438754	CXCL12		KEGG	Vasopressin-regulated water reabsorption_Homo sapiens_hsa04962	0.189192	0.338331	VAMP2		KEGG	Fc gamma R-mediated phagocytosis_Homo sapiens_hsa04666	0.390645	0.453017	MYO10		GO_BP	axon regeneration (GO:0031103)	0.00078115	0.0518755	GAP43;APOA1
	KEGG	Non-small cell lung cancer_Homo sapiens_hsa05223	0.187688	0.381334	CCND1		KEGG	Vibrio cholerae infection_Homo sapiens_hsa05110	0.215832	0.338331	ATP6V0B		KEGG	Prostate cancer_Homo sapiens_hsa05215	0.377493	0.445248	CCND1		GO_BP	positive regulation of insulin receptor signaling pathway (GO:0046628)	0.000690329	0.0518755	IGF2;INS
	KEGG	Acute myeloid leukemia_Homo sapiens_hsa05221	0.190702	0.381404	CCND1		KEGG	Type II diabetes mellitus_Homo sapiens_hsa04930	0.204523	0.338331	PKM		KEGG	Rheumatoid arthritis_Homo sapiens_hsa05323	0.380807	0.445351	ATP6V0B		GO_BP	positive regulation of insulin receptor signaling pathway by insulin receptor internalization (GO:0038015)	8.7653e-05	0.0240883	IGF2;INS
	KEGG	Amphetamine addiction_Homo sapiens_hsa05031	0.220242	0.390955	CALM2		KEGG	Fatty acid metabolism_Homo sapiens_hsa01212	0.204523	0.338331	SCD		KEGG	Gap junction_Homo sapiens_hsa04540	0.374162	0.445123	TUBA1A		GO_BP	negative regulation of oxidative phosphorylation (GO:0090324)	0.0014396	0.0521259	CDKN1C;INHBA
	KEGG	Axon guidance_Homo sapiens_hsa04360	0.376411	0.450286	CXCL12		KEGG	Ovarian steroidogenesis_Homo sapiens_hsa04913	0.21208	0.338331	ADCY1		KEGG	Insulin secretion_Homo sapiens_hsa04911	0.36406	0.440705	GCG		GO_BP	positive regulation of hydrolase activity (GO:0051345)	0.0014396	0.0521259	IGF2;APOA1
	KEGG	Renin secretion_Homo sapiens_hsa04924	0.211493	0.390955	CALM2		KEGG	Cocaine addiction_Homo sapiens_hsa05030	0.20831	0.338331	ATF4		KEGG	Salmonella infection_Homo sapiens_hsa05132	0.367445	0.440934	ACTB		GO_BP	negative regulation of cyclin-dependent protein kinase activity (GO:1904030)	0.00106827	0.0521259	CDKN1C;PPP1R1A;LRTM1
	KEGG	Colorectal cancer_Homo sapiens_hsa05210	0.205607	0.390955	CCND1		KEGG	Amyotrophic lateral sclerosis (ALS)_Homo sapiens_hsa05014	0.215832	0.338331	NEFM		KEGG	Chronic myeloid leukemia_Homo sapiens_hsa05220	0.322015	0.411464	CCND1		GO_BP	positive regulation of tyrosine phosphorylation of STAT protein (GO:0042531)	0.00189125	0.0521259	IGF2;MIF;INS
	KEGG	Retrograde endocannabinoid signaling_Homo sapiens_hsa04723	0.31294	0.408738	GNG3		KEGG	Ether lipid metabolism_Homo sapiens_hsa00565	0.193052	0.338331	PLD3		KEGG	Melanoma_Homo sapiens_hsa05218	0.314745	0.411464	CCND1		GO_BP	positive regulation of glycogen biosynthetic process (GO:0045725)	0.000690329	0.0518755	IGF2;INS
	KEGG	Vascular smooth muscle contraction_Homo sapiens_hsa04270	0.359915	0.438754	CALM2		KEGG	N-Glycan biosynthesis_Homo sapiens_hsa00510	0.20831	0.338331	MAN1A1		KEGG	ECM-receptor interaction_Homo sapiens_hsa04512	0.353798	0.432072	ITGB1		GO_BP	insulin receptor recycling (GO:0038020)	0.000450826	0.0439104	IGF2;INS
	KEGG	Bladder cancer_Homo sapiens_hsa05219	0.141127	0.371117	CCND1		KEGG	Mineral absorption_Homo sapiens_hsa04978	0.215832	0.338331	FTL		KEGG	Prolactin signaling pathway_Homo sapiens_hsa04917	0.31839	0.411464	CCND1		GO_BP	positive regulation of activation of Janus kinase activity (GO:0010536)	0.00274584	0.0521259	IGF2;MIF;INS
	KEGG	African trypanosomiasis_Homo sapiens_hsa05143	0.121774	0.371117	APOA1		KEGG	Glutathione metabolism_Homo sapiens_hsa00480	0.219566	0.339596	GPX4		KEGG	B cell receptor signaling pathway_Homo sapiens_hsa04662	0.322015	0.411464	CD81		GO_BP	positive regulation of endothelin secretion (GO:1904472)	0.000979113	0.0521259	MIF;INS
	KEGG	Bacterial invasion of epithelial cells_Homo sapiens_hsa05100	0.251508	0.397444	ELMO1		KEGG	Fat digestion and absorption_Homo sapiens_hsa04975	0.177503	0.338331	APOA1		KEGG	RNA degradation_Homo sapiens_hsa03018	0.336328	0.421938	ENO1		GO_BP	positive regulation of transforming growth factor-beta secretion (GO:2001203)	0.000979113	0.0521259	MIF;INS
	KEGG	Chemical carcinogenesis_Homo sapiens_hsa05204	0.262568	0.404924	GSTA1		KEGG	African trypanosomiasis_Homo sapiens_hsa05143	0.153621	0.312633	APOA1		KEGG	Complement and coagulation cascades_Homo sapiens_hsa04610	0.343371	0.426894	SERPINA1		GO_BP	positive regulation by symbiont of host cytokine secretion (GO:0036523)	0.000979113	0.0521259	MIF;INS
	KEGG	Metabolism of xenobiotics by cytochrome P450_Homo sapiens_hsa00980	0.237452	0.394726	GSTA1		KEGG	Pyruvate metabolism_Homo sapiens_hsa00620	0.173569	0.338331	PKM		KEGG	Leishmaniasis_Homo sapiens_hsa05140	0.322015	0.411464	ITGB1		GO_BP	positive regulation of protein tyrosine kinase activity (GO:0061098)	0.00241783	0.0521259	IGF2;MIF;INS
	KEGG	Pertussis_Homo sapiens_hsa05133	0.243105	0.397444	CALM2		KEGG	SNARE interactions in vesicular transport_Homo sapiens_hsa04130	0.149575	0.309833	VAMP2		KEGG	Inositol phosphate metabolism_Homo sapiens_hsa00562	0.314745	0.411464	TPI1		GO_BP	positive regulation of prosthetic group metabolic process (GO:0051200)	0.000690329	0.0518755	INHBA;INS
	KEGG	Drug metabolism - cytochrome P450_Homo sapiens_hsa00982	0.226021	0.390955	GSTA1		KEGG	Citrate cycle (TCA cycle)_Homo sapiens_hsa00020	0.133197	0.297132	ACLY		KEGG	Pancreatic cancer_Homo sapiens_hsa05212	0.296229	0.411464	CCND1		GO_BP	negative regulation of phosphorylation (GO:0042326)	0.00184064	0.0521259	CDKN1C;INHBA
	KEGG	Fatty acid metabolism_Homo sapiens_hsa01212	0.163174	0.381309	SCD		KEGG	Glycosylphosphatidylinositol(GPI)-anchor biosynthesis_Homo sapiens_hsa00563	0.112285	0.270296	GPAA1		KEGG	Adherens junction_Homo sapiens_hsa04520	0.325622	0.412255	ACTB		GO_BP	positive regulation of glial cell-derived neurotrophic factor secretion (GO:1900168)	0.00119867	0.0521259	MIF;INS
	KEGG	Antigen processing and presentation_Homo sapiens_hsa04612	0.248717	0.397444	CD74		KEGG	Biosynthesis of unsaturated fatty acids_Homo sapiens_hsa01040	0.103781	0.26733	SCD		KEGG	p53 signaling pathway_Homo sapiens_hsa04115	0.307397	0.411464	CCND1		GO_BP	negative regulation of kinase activity (GO:0033673)	0.00170171	0.0521259	CDKN1C;INHBA
	KEGG	p53 signaling pathway_Homo sapiens_hsa04115	0.226021	0.390955	CCND1		KEGG	Vitamin digestion and absorption_Homo sapiens_hsa04977	0.108043	0.26733	APOA1		KEGG	Epithelial cell signaling in Helicobacter pylori infection_Homo sapiens_hsa05120	0.303694	0.411464	ATP6V0B		GO_BP	positive regulation of protein modification process (GO:0031401)	0.00087742	0.0521259	INHBA;INS
	KEGG	Viral myocarditis_Homo sapiens_hsa05416	0.196697	0.387254	CCND1		KEGG	Maturity onset diabetes of the young_Homo sapiens_hsa04950	0.116507	0.270296	RFX6		KEGG	Colorectal cancer_Homo sapiens_hsa05210	0.281061	0.405298	CCND1		GO_BP	positive regulation of cytokine secretion involved in immune response (GO:0002741)	0.00170171	0.0521259	MIF;INS
	KEGG	Shigellosis_Homo sapiens_hsa05131	0.21442	0.390955	ELMO1		KEGG	Renin-angiotensin system_Homo sapiens_hsa04614	0.103781	0.26733	AGT		KEGG	Acute myeloid leukemia_Homo sapiens_hsa05221	0.261644	0.384116	CCND1		GO_BP	positive regulation of interleukin-5 secretion (GO:2000664)	0.0014396	0.0521259	MIF;INS
	KEGG	Vasopressin-regulated water reabsorption_Homo sapiens_hsa04962	0.150645	0.378089	VAMP2		GO_BP	translation (GO:0006412)	6.09183e-06	0.0119156	SERPINA1;RPS29;RPL23;IGFBP2;IGF2;RPLP2;APOA1;SCG3;RPS11;FBN1		KEGG	Synaptic vesicle cycle_Homo sapiens_hsa04721	0.284883	0.405298	ATP6V0B		GO_BP	negative regulation of translation (GO:0017148)	0.00782237	0.0985214	IGFBP5;ENC1;MIF
	KEGG	Glutathione metabolism_Homo sapiens_hsa00480	0.175521	0.381309	GSTA1		GO_BP	neutrophil degranulation (GO:0043312)	0.000106149	0.04846	DSP;ACLY;PRDX4;SERPINA1;RAB3A;PKM;NPC2;NBEAL2;CYSTM1;FTL		KEGG	Non-small cell lung cancer_Homo sapiens_hsa05223	0.257699	0.382392	CCND1		GO_BP	positive regulation of interleukin-1 secretion (GO:0050716)	0.00119867	0.0521259	MIF;INS
	KEGG	Intestinal immune network for IgA production_Homo sapiens_hsa04672	0.163174	0.381309	CXCL12		GO_BP	cellular protein metabolic process (GO:0044267)	0.000276776	0.04846	SERPINA1;IGFBP2;IGF2;APOA1;SCG3;FBN1		KEGG	Endometrial cancer_Homo sapiens_hsa05213	0.241708	0.366546	CCND1		GO_BP	positive regulation of pancreatic stellate cell proliferation (GO:2000231)	0.00198479	0.0521259	S100A6;MIF
	KEGG	Fat digestion and absorption_Homo sapiens_hsa04975	0.141127	0.371117	APOA1		GO_BP	ferredoxin metabolic process (GO:0006124)	0.000276776	0.04846	SERPINA1;IGFBP2;IGF2;APOA1;SCG3;FBN1		KEGG	Malaria_Homo sapiens_hsa05144	0.229491	0.359884	CD81		GO_BP	positive regulation of hepatic stellate cell proliferation (GO:1904899)	0.00198479	0.0521259	S100A6;MIF
	KEGG	Phototransduction_Homo sapiens_hsa04744	0.0952988	0.358772	CALM2		GO_BP	rhodopsin metabolic process (GO:0046154)	0.000276776	0.04846	SERPINA1;IGFBP2;IGF2;APOA1;SCG3;FBN1		KEGG	Arginine and proline metabolism_Homo sapiens_hsa00330	0.233585	0.362188	SAT1		GO_BP	positive regulation of protein autophosphorylation (GO:0031954)	0.00380589	0.0656203	CCND1;IGF2;INS
	KEGG	Propanoate metabolism_Homo sapiens_hsa00640	0.111936	0.371117	LDHA		GO_BP	prosthetic group metabolic process (GO:0051189)	0.000276776	0.04846	SERPINA1;IGFBP2;IGF2;APOA1;SCG3;FBN1		KEGG	Type II diabetes mellitus_Homo sapiens_hsa04930	0.225376	0.357493	PKM		GO_BP	positive regulation of peptidyl-serine phosphorylation (GO:0033138)	0.00707161	0.0922467	CCND1;IGF2;MIF
	KEGG	Regulation of autophagy_Homo sapiens_hsa04140	0.134723	0.371117	INS		GO_BP	protein repair (GO:0030091)	0.000327493	0.04846	SERPINA1;IGFBP2;IGF2;APOA1;SCG3;FBN1		KEGG	Mineral absorption_Homo sapiens_hsa04978	0.237657	0.364408	FTL		GO_BP	platelet degranulation (GO:0002576)	0.00450933	0.0736449	IGF2;ENDOD1;APOA1
	KEGG	Type I diabetes mellitus_Homo sapiens_hsa04940	0.147484	0.377558	INS		GO_BP	CAAX-box protein maturation (GO:0080120)	0.000345927	0.04846	SERPINA1;IGFBP2;IGF2;APOA1;SCG3;FBN1		KEGG	Fatty acid metabolism_Homo sapiens_hsa01212	0.225376	0.357493	SCD		GO_BP	negative regulation of protein kinase activity (GO:0006469)	0.0049864	0.0791862	CDKN1C;PPP1R1A;LRTM1
	KEGG	Cysteine and methionine metabolism_Homo sapiens_hsa00270	0.153794	0.378571	LDHA		GO_BP	Notch receptor processing (GO:0007220)	0.000406147	0.0520848	SERPINA1;IGFBP2;IGF2;APOA1;SCG3;FBN1		KEGG	Bladder cancer_Homo sapiens_hsa05219	0.195952	0.333845	CCND1		GO_BP	negative regulation of glycolytic process (GO:0045820)	0.00213413	0.0521259	CDKN1C;INHBA
	KEGG	Biosynthesis of unsaturated fatty acids_Homo sapiens_hsa01040	0.0817677	0.348071	SCD		GO_BP	cellular protein catabolic process (GO:0044257)	0.000578614	0.0565885	SERPINA1;IGFBP2;IGF2;APOA1;SCG3;FBN1		KEGG	Cysteine and methionine metabolism_Homo sapiens_hsa00270	0.212899	0.353976	LDHA		GO_BP	positive regulation of protein phosphorylation (GO:0001934)	0.00602928	0.090168	CCND1;IGF2;MIF
	KEGG	SNARE interactions in vesicular transport_Homo sapiens_hsa04130	0.118506	0.371117	VAMP2		GO_BP	mitochondrial protein processing (GO:0034982)	0.00085919	0.0598908	SERPINA1;IGFBP2;IGF2;APOA1;SCG3;FBN1		KEGG	Nicotine addiction_Homo sapiens_hsa05033	0.191659	0.333845	GABRB3		GO_BP	ripoptosome assembly involved in extrinsic apoptotic signaling pathway (GO:1901025)	0.00228863	0.0521259	MLLT11;INHBA
	KEGG	Vitamin digestion and absorption_Homo sapiens_hsa04977	0.085169	0.348071	APOA1		GO_BP	positive regulation of cholesterol esterification (GO:0010873)	5.55911e-05	0.04846	ACLY;APOA1;AGT		KEGG	Fat digestion and absorption_Homo sapiens_hsa04975	0.195952	0.333845	APOA1		GO_BP	extrinsic apoptotic signaling pathway (GO:0097191)	0.00228863	0.0521259	MLLT11;INHBA
	GO_BP	chylomicron assembly (GO:0034378)	5.72718e-06	0.00124684	APOA2;APOA1;APOC3		GO_BP	vacuolar protein processing (GO:0006624)	0.00085919	0.0598908	SERPINA1;IGFBP2;IGF2;APOA1;SCG3;FBN1		KEGG	Thyroid cancer_Homo sapiens_hsa05216	0.142914	0.29436	CCND1		GO_BP	positive regulation of interleukin-13 secretion (GO:2000667)	0.00198479	0.0521259	MIF;INS
	GO_BP	negative regulation of lipid catabolic process (GO:0050995)	1.71883e-05	0.00197666	APOA2;APOC3;INS		GO_BP	sterol regulatory element binding protein cleavage (GO:0035103)	0.000918031	0.0598908	SERPINA1;IGFBP2;IGF2;APOA1;SCG3;FBN1		KEGG	African trypanosomiasis_Homo sapiens_hsa05143	0.169853	0.308602	APOA1		GO_BP	positive regulation of pathway-restricted SMAD protein phosphorylation (GO:0010862)	0.00648024	0.090168	CCND1;IGF2;INHBA
	GO_BP	chylomicron remodeling (GO:0034371)	4.01972e-06	0.00124684	APOA2;APOA1;APOC3		GO_BP	signal peptide processing (GO:0006465)	0.00123481	0.0603822	SERPINA1;IGFBP2;IGF2;APOA1;SCG3;FBN1		KEGG	Propanoate metabolism_Homo sapiens_hsa00640	0.15649	0.304928	LDHA		GO_BP	positive regulation of maintenance of mitotic sister chromatid cohesion (GO:0034184)	0.00213413	0.0521259	IGF2;INS
	GO_BP	negative regulation of juvenile hormone catabolic process (GO:0045970)	1.0444e-05	0.00170151	APOA2;APOC3;INS		GO_BP	triglyceride homeostasis (GO:0070328)	0.000149747	0.04846	MLXIPL;APOA1;APOC3		KEGG	Fructose and mannose metabolism_Homo sapiens_hsa00051	0.15649	0.304928	TPI1		GO_BP	positive regulation of mitotic cohesin loading (GO:1905406)	0.0014396	0.0521259	IGF2;INS
	GO_BP	negative regulation of triglyceride catabolic process (GO:0010897)	1.71883e-05	0.00197666	APOA2;APOC3;INS		GO_BP	cellular protein modification process (GO:0006464)	0.00185937	0.0680203	SERPINA1;IGFBP2;IGF2;APOA1;SCG3;FBN1		KEGG	Citrate cycle (TCA cycle)_Homo sapiens_hsa00020	0.147463	0.299263	PDHB		GO_BP	positive regulation of attachment of mitotic spindle microtubules to kinetochore (GO:1902425)	0.00228863	0.0521259	IGF2;INS
	GO_BP	negative regulation of 1-phosphatidyl-1D-myo-inositol 4,5-bisphosphate catabolic process (GO:1902642)	1.0444e-05	0.00170151	APOA2;APOC3;INS		GO_BP	platelet degranulation (GO:0002576)	0.000479308	0.0520848	SERPINA1;SERPINF2;IGF2;APOA1;SCG3		KEGG	Glycosylphosphatidylinositol(GPI)-anchor biosynthesis_Homo sapiens_hsa00563	0.124476	0.286294	GPAA1		GO_BP	positive regulation of mitotic chromosome condensation (GO:1903380)	0.00213413	0.0521259	IGF2;INS
	GO_BP	negative regulation of glucocorticoid catabolic process (GO:0031950)	1.0444e-05	0.00170151	APOA2;APOC3;INS		GO_BP	cellular triglyceride homeostasis (GO:0035356)	0.000312041	0.04846	MLXIPL;APOA1;APOC3		KEGG	Biosynthesis of unsaturated fatty acids_Homo sapiens_hsa01040	0.11511	0.280222	SCD		GO_BP	positive regulation of interleukin-2 secretion (GO:1900042)	0.00261305	0.0521259	MIF;INS
	GO_BP	negative regulation of butyryl-CoA catabolic process to butanol (GO:1900498)	1.35411e-05	0.00189092	APOA2;APOC3;INS		GO_BP	vesicle-mediated cholesterol transport (GO:0090119)	0.000448594	0.0520848	NPC2;PLIN3;SYT7;VAMP2		KEGG	Maturity onset diabetes of the young_Homo sapiens_hsa04950	0.129122	0.288511	RFX6		GO_BP	positive regulation of mitotic sister chromatid separation (GO:1901970)	0.00198479	0.0521259	IGF2;INS
	GO_BP	negative regulation of prostaglandin catabolic process (GO:1905829)	1.35411e-05	0.00189092	APOA2;APOC3;INS		GO_BP	reverse cholesterol transport (GO:0043691)	0.000279568	0.04846	NPC2;APOA1;APOC3		KEGG	Vitamin digestion and absorption_Homo sapiens_hsa04977	0.119805	0.280222	APOA1		GO_BP	positive regulation of glycolytic process (GO:0045821)	0.00390757	0.0656203	MIF;INS
	GO_BP	negative regulation of phosphatidylcholine catabolic process (GO:0010900)	1.71883e-05	0.00197666	APOA2;APOC3;INS		GO_BP	phospholipid efflux (GO:0033700)	0.000346851	0.04846	NPC2;APOA1;APOC3		KEGG	Renin-angiotensin system_Homo sapiens_hsa04614	0.11511	0.280222	AGT		GO_BP	regulation of endocannabinoid signaling pathway (GO:2000124)	0.00244828	0.0521259	RGS4;RGS16
	GO_BP	negative regulation of fatty acid beta-oxidation (GO:0031999)	4.5152e-05	0.00383792	APOA2;APOC3;INS		GO_BP	cholesterol efflux (GO:0033344)	0.00051083	0.0525886	NPC2;APOA1;APOC3		GO_BP	cellular protein modification process (GO:0006464)	1.79541e-06	0.000459176	SERPINA1;RPN2;STC2;IGF2;APOA1;SCG3;TIMP1;SCG2;PDIA6;FBN1		GO_BP	extrinsic apoptotic signaling pathway in absence of ligand (GO:0097192)	0.00411238	0.0682748	MLLT11;INHBA
	GO_BP	phosphatidylcholine biosynthesis from phosphatidylethanolamine (GO:0090638)	5.73994e-06	0.00124684	ACHE;STARD10;APOA2;APOA1		GO_BP	chylomicron assembly (GO:0034378)	0.000980056	0.0598908	APOA1;APOC3		GO_BP	translation (GO:0006412)	2.40728e-06	0.000492529	SERPINA1;RPS29;STC2;IGF2;APOA1;SCG3;TIMP1;RPS11;SCG2;PDIA6;FBN1		GO_BP	regulation of octopamine or tyramine signaling pathway (GO:2000125)	0.00228863	0.0521259	RGS4;RGS16
	GO_BP	phosphatidylcholine biosynthesis from phosphoryl-ethanolamine via CDP-N-methylethanolamine (GO:0070833)	5.73994e-06	0.00124684	ACHE;STARD10;APOA2;APOA1		GO_BP	angiotensin-mediated vasoconstriction involved in regulation of systemic arterial blood pressure (GO:0001998)	0.00119414	0.0598908	SERPINF2;AGT		GO_BP	prosthetic group metabolic process (GO:0051189)	7.09054e-07	0.000342465	SERPINA1;STC2;IGF2;APOA1;SCG3;TIMP1;SCG2;PDIA6;FBN1		GO_BP	regulation of pheromone-dependent signal transduction involved in conjugation with cellular fusion (GO:0010969)	0.00228863	0.0521259	RGS4;RGS16
	GO_BP	phosphatidylcholine biosynthesis from phosphoryl-ethanolamine via N-dimethylethanolamine phosphate and CDP-choline (GO:0070832)	5.73994e-06	0.00124684	ACHE;STARD10;APOA2;APOA1		GO_BP	SRP-dependent cotranslational protein targeting to membrane, docking (GO:0006615)	0.000821139	0.0598908	RPS29;RPL23;RPLP2;RPS11		GO_BP	cellular protein metabolic process (GO:0044267)	7.09054e-07	0.000342465	SERPINA1;STC2;IGF2;APOA1;SCG3;TIMP1;SCG2;PDIA6;FBN1		GO_BP	positive regulation of fatty acid biosynthetic process (GO:0045723)	0.00228863	0.0521259	APOA1;INS
	GO_BP	phosphatidylcholine biosynthesis from sn-glycero-3-phosphocholine (GO:0090640)	5.73994e-06	0.00124684	ACHE;STARD10;APOA2;APOA1		GO_BP	SRP-dependent cotranslational protein targeting to membrane, translocation (GO:0006616)	0.000969809	0.0598908	RPS29;RPL23;RPLP2;RPS11		GO_BP	rhodopsin metabolic process (GO:0046154)	7.09054e-07	0.000342465	SERPINA1;STC2;IGF2;APOA1;SCG3;TIMP1;SCG2;PDIA6;FBN1		GO_BP	regulation of proteinase activated receptor activity (GO:1900276)	0.00244828	0.0521259	RGS4;RGS16
	GO_BP	phosphatidylcholine biosynthesis from choline and CDP-diacylglycerol (GO:0090639)	5.73994e-06	0.00124684	ACHE;STARD10;APOA2;APOA1		GO_BP	RNA-templated viral transcription (GO:0039696)	0.00175577	0.0660441	RPS29;RPL23;RPLP2;RPS11		GO_BP	ferredoxin metabolic process (GO:0006124)	7.09054e-07	0.000342465	SERPINA1;STC2;IGF2;APOA1;SCG3;TIMP1;SCG2;PDIA6;FBN1		GO_BP	modulation by symbiont of host G-protein coupled receptor protein signal transduction (GO:0075118)	0.00228863	0.0521259	RGS4;RGS16
	GO_BP	CDP-choline pathway (GO:0006657)	5.73994e-06	0.00124684	ACHE;STARD10;APOA2;APOA1		GO_BP	late viral transcription (GO:0019086)	0.00200571	0.0688277	RPS29;RPL23;RPLP2;RPS11		GO_BP	protein repair (GO:0030091)	9.21989e-07	0.000342465	SERPINA1;STC2;IGF2;APOA1;SCG3;TIMP1;SCG2;PDIA6;FBN1		GO_BP	positive regulation of mitotic spindle elongation (GO:1902846)	0.00244828	0.0521259	IGF2;INS
	GO_BP	phosphatidylcholine biosynthesis from phosphoryl-ethanolamine via N-dimethylethanolamine phosphate and CDP-N-dimethylethanolamine (GO:0070834)	5.73994e-06	0.00124684	ACHE;STARD10;APOA2;APOA1		GO_BP	early viral transcription (GO:0019085)	0.00187786	0.0680203	RPS29;RPL23;RPLP2;RPS11		GO_BP	CAAX-box protein maturation (GO:0080120)	1.0043e-06	0.000342465	SERPINA1;STC2;IGF2;APOA1;SCG3;TIMP1;SCG2;PDIA6;FBN1		GO_BP	positive regulation of interferon-alpha secretion (GO:1902741)	0.00244828	0.0521259	MIF;INS
	GO_BP	phosphatidylcholine biosynthetic process (GO:0006656)	2.29333e-05	0.00249081	ACHE;STARD10;APOA2;APOA1		GO_BP	DNA-templated viral transcription (GO:0039695)	0.00175577	0.0660441	RPS29;RPL23;RPLP2;RPS11		GO_BP	Notch receptor processing (GO:0007220)	1.29051e-06	0.000377196	SERPINA1;STC2;IGF2;APOA1;SCG3;TIMP1;SCG2;PDIA6;FBN1		GO_BP	regulation of adrenergic receptor signaling pathway (GO:0071877)	0.00228863	0.0521259	RGS4;RGS16
	GO_BP	negative regulation of butyryl-CoA catabolic process to butyrate (GO:1900501)	4.5152e-05	0.00383792	APOA2;APOC3;INS		GO_BP	middle viral transcription (GO:0019084)	0.00175577	0.0660441	RPS29;RPL23;RPLP2;RPS11		GO_BP	cellular protein catabolic process (GO:0044257)	2.24514e-06	0.000492529	SERPINA1;STC2;IGF2;APOA1;SCG3;TIMP1;SCG2;PDIA6;FBN1		GO_BP	regulation of adenosine receptor signaling pathway (GO:0060167)	0.00228863	0.0521259	RGS4;RGS16
	GO_BP	detection of glucose (GO:0051594)	9.30654e-05	0.00727771	NEUROD1;APOA2;VAMP2		GO_BP	regulation of Cdc42 protein signal transduction (GO:0032489)	0.00142854	0.0635052	APOA1;APOC3		GO_BP	mitochondrial protein processing (GO:0034982)	4.1734e-06	0.000656828	SERPINA1;STC2;IGF2;APOA1;SCG3;TIMP1;SCG2;PDIA6;FBN1		GO_BP	regulation of G-protein coupled receptor protein signaling pathway in response to host (GO:0075156)	0.00228863	0.0521259	RGS4;RGS16
	GO_BP	response to glucose (GO:0009749)	6.16445e-05	0.00502145	NEUROD1;APOA2;VAMP2		GO_BP	SRP-dependent cotranslational protein targeting to membrane, signal sequence recognition (GO:0006617)	0.0014227	0.0635052	RPS29;RPL23;RPLP2;RPS11		GO_BP	vacuolar protein processing (GO:0006624)	4.1734e-06	0.000656828	SERPINA1;STC2;IGF2;APOA1;SCG3;TIMP1;SCG2;PDIA6;FBN1		GO_BP	regulation of thrombin-activated receptor signaling pathway (GO:0070494)	0.00228863	0.0521259	RGS4;RGS16
	GO_BP	apolipoprotein E recycling (GO:0071828)	2.96997e-05	0.00296552	APOA2;APOA1;APOC3;VAMP2		GO_BP	2-methylbutanoyl-CoA(4-) biosynthetic process (GO:1902191)	0.00119414	0.0598908	ACLY;SCD		GO_BP	sterol regulatory element binding protein cleavage (GO:0035103)	4.63095e-06	0.000676781	SERPINA1;STC2;IGF2;APOA1;SCG3;TIMP1;SCG2;PDIA6;FBN1		GO_BP	modulation by host of symbiont G-protein coupled receptor protein signal transduction (GO:0075087)	0.00228863	0.0521259	RGS4;RGS16
	GO_BP	rhodopsin metabolic process (GO:0046154)	0.00066322	0.0274256	IGFBP5;IGF2;APOA2;APOA1;INS		GO_BP	viral RNA editing (GO:0075527)	0.00250058	0.0809348	RPS29;RPL23;RPLP2;RPS11		GO_BP	signal peptide processing (GO:0006465)	7.38129e-06	0.00100681	SERPINA1;STC2;IGF2;APOA1;SCG3;TIMP1;SCG2;PDIA6;FBN1		GO_BP	regulation of phospholipase C-activating G-protein coupled receptor signaling pathway (GO:1900736)	0.00228863	0.0521259	RGS4;RGS16
	GO_BP	prosthetic group metabolic process (GO:0051189)	0.00066322	0.0274256	IGFBP5;IGF2;APOA2;APOA1;INS		GO_BP	viral transcription (GO:0019083)	0.00250058	0.0809348	RPS29;RPL23;RPLP2;RPS11		GO_BP	post-translational protein modification (GO:0043687)	0.000463202	0.0160629	SERPINA1;RPN2;STC2;APOA1;SCG3;TIMP1;SCG2;PDIA6;FBN1		GO_BP	protein kinase C deactivation (GO:0042313)	0.00244828	0.0521259	RGS4;RGS16
	GO_BP	cellular protein metabolic process (GO:0044267)	0.00066322	0.0274256	IGFBP5;IGF2;APOA2;APOA1;INS		GO_BP	isovaleryl-CoA(4-) biosynthetic process (GO:1902197)	0.00119414	0.0598908	ACLY;SCD		GO_BP	positive regulation of fibroblast proliferation (GO:0048146)	0.00050277	0.0171445	CD74;EDN3;EPCAM;CD81;IGF2;S100A6;TIMP1;AGT		GO_BP	positive regulation of chemokine secretion (GO:0090197)	0.00390757	0.0656203	MIF;INS
	GO_BP	ferredoxin metabolic process (GO:0006124)	0.00066322	0.0274256	IGFBP5;IGF2;APOA2;APOA1;INS		GO_BP	2-methylbut-2-enoyl-CoA(4-) biosynthetic process (GO:1902194)	0.00119414	0.0598908	ACLY;SCD		GO_BP	positive regulation of apoptotic process (GO:0043065)	0.000851006	0.0259875	MLLT11;ITGB1;PRDX2;MAGED1;INHA;NDRG1;RTN4;TPT1		GO_BP	regulation of opioid receptor signaling pathway (GO:2000474)	0.00261305	0.0521259	RGS4;RGS16
	GO_BP	protein repair (GO:0030091)	0.000764121	0.0292913	IGFBP5;IGF2;APOA2;APOA1;INS		GO_BP	SRP-dependent cotranslational protein targeting to membrane, signal sequence processing (GO:0006618)	0.00175577	0.0660441	RPS29;RPL23;RPLP2;RPS11		GO_BP	glycolytic process (GO:0006096)	3.92513e-06	0.000656828	LDHA;TPI1;PGK1;PDHB;SLC16A3		GO_BP	positive regulation of cellular protein metabolic process (GO:0032270)	0.00313779	0.0559062	INHBA;INS
	GO_BP	CAAX-box protein maturation (GO:0080120)	0.000800178	0.029516	IGFBP5;IGF2;APOA2;APOA1;INS		GO_BP	calcium ion regulated lysosome exocytosis (GO:1990927)	0.000980056	0.0598908	VAMP2;SYT7		GO_BP	C-terminal protein amino acid modification (GO:0018410)	0.000606468	0.0195849	SERPINA1;STC2;APOA1;SCG3;TIMP1;SCG2;PDIA6;FBN1		GO_BP	CDP-choline pathway (GO:0006657)	0.0027829	0.0521259	STARD10;APOA1
	GO_BP	Notch receptor processing (GO:0007220)	0.000915996	0.0319781	IGFBP5;IGF2;APOA2;APOA1;INS		GO_BP	fatty-acyl-CoA biosynthetic process (GO:0046949)	0.00119414	0.0598908	ACLY;SCD		GO_BP	N-terminal protein amino acid propionylation (GO:0061606)	0.000606468	0.0195849	SERPINA1;STC2;APOA1;SCG3;TIMP1;SCG2;PDIA6;FBN1		GO_BP	phosphatidylcholine biosynthesis from choline and CDP-diacylglycerol (GO:0090639)	0.0027829	0.0521259	STARD10;APOA1
	GO_BP	high-density lipoprotein particle remodeling (GO:0034375)	3.18547e-05	0.00296552	APOA2;APOA1;APOC3		GO_BP	regulation of blood vessel diameter by renin-angiotensin (GO:0002034)	0.000786477	0.0598908	SERPINF2;AGT		GO_BP	CAAX-box protein modification (GO:0071587)	0.000606468	0.0195849	SERPINA1;STC2;APOA1;SCG3;TIMP1;SCG2;PDIA6;FBN1		GO_BP	positive regulation of G-protein coupled receptor protein signaling pathway (GO:0045745)	0.00453664	0.0736449	RGS4;RGS16
	GO_BP	conversion of discoidal high-density lipoprotein particle to spherical high-density lipoprotein particle (GO:0034376)	3.18547e-05	0.00296552	APOA2;APOA1;APOC3		GO_BP	cholesterol transport (GO:0030301)	0.00256542	0.0809348	NPC2;APOA1		GO_BP	post-translational protein acetylation (GO:0034421)	0.000766485	0.023761	SERPINA1;STC2;APOA1;SCG3;TIMP1;SCG2;PDIA6;FBN1		GO_BP	phosphatidylcholine biosynthetic process (GO:0006656)	0.00544314	0.0837098	STARD10;APOA1
	GO_BP	cellular protein catabolic process (GO:0044257)	0.00123445	0.0360202	IGFBP5;IGF2;APOA2;APOA1;INS		GO_BP	SRP-dependent cotranslational protein targeting to membrane (GO:0006614)	0.00132227	0.0630822	RPS29;RPL23;RPLP2;RPS11		GO_BP	platelet degranulation (GO:0002576)	8.64967e-05	0.00847393	SERPINA1;IGF2;APOA1;SCG3;MAGED2;TIMP1		GO_BP	phosphatidylcholine biosynthesis from phosphatidylethanolamine (GO:0090638)	0.0027829	0.0521259	STARD10;APOA1
	GO_BP	mitochondrial protein processing (GO:0034982)	0.00172357	0.0415996	IGFBP5;IGF2;APOA2;APOA1;INS		GO_BP	intestinal cholesterol absorption (GO:0030299)	0.00325076	0.0949028	NPC2;APOA1		GO_BP	canonical glycolysis (GO:0061621)	1.19087e-05	0.00152283	TPI1;PKM;PGK1;ENO1		GO_BP	phosphatidylcholine biosynthesis from phosphoryl-ethanolamine via N-dimethylethanolamine phosphate and CDP-N-dimethylethanolamine (GO:0070834)	0.0027829	0.0521259	STARD10;APOA1
	GO_BP	vacuolar protein processing (GO:0006624)	0.00172357	0.0415996	IGFBP5;IGF2;APOA2;APOA1;INS		GO_BP	low-density lipoprotein particle disassembly involved in cholesterol transport (GO:0090121)	0.00168306	0.0660441	NPC2;APOA1		GO_BP	negative regulation of apoptotic process (GO:0043066)	0.00341357	0.0802776	PRDX2;CD74;MAGED1;DPEP1;INHA;NDRG1;TPT1;RTN4		GO_BP	phosphatidylcholine biosynthesis from phosphoryl-ethanolamine via N-dimethylethanolamine phosphate and CDP-choline (GO:0070832)	0.0027829	0.0521259	STARD10;APOA1
	GO_BP	sterol regulatory element binding protein cleavage (GO:0035103)	0.00182279	0.0424233	IGFBP5;IGF2;APOA2;APOA1;INS		GO_BP	3-methylbut-2-enoyl-CoA(4-) biosynthetic process (GO:1902200)	0.00119414	0.0598908	ACLY;SCD		GO_BP	regulation of apoptotic process involved in development (GO:1904748)	0.000165153	0.00847393	PRDX2;MAGED1;INHA;NDRG1;RTN4;TPT1		GO_BP	phosphatidylcholine biosynthesis from phosphoryl-ethanolamine via CDP-N-methylethanolamine (GO:0070833)	0.0027829	0.0521259	STARD10;APOA1
	GO_BP	signal peptide processing (GO:0006465)	0.00234211	0.0508758	IGFBP5;IGF2;APOA2;APOA1;INS		GO_BP	positive regulation of isoprenoid metabolic process (GO:0045828)	0.000461631	0.0520848	ACLY;NPC2		GO_BP	regulation of apoptotic process (GO:0042981)	0.000165153	0.00847393	PRDX2;MAGED1;INHA;NDRG1;RTN4;TPT1		GO_BP	cross-receptor inhibition within G-protein coupled receptor heterodimer (GO:0038041)	0.00244828	0.0521259	RGS4;RGS16
	GO_BP	cellular protein modification process (GO:0006464)	0.00331263	0.0594949	IGFBP5;IGF2;APOA2;APOA1;INS		GO_BP	chylomicron remodeling (GO:0034371)	0.000786477	0.0598908	APOA1;APOC3		GO_BP	regulation of leukocyte apoptotic process (GO:2000106)	0.000165153	0.00847393	PRDX2;MAGED1;INHA;NDRG1;RTN4;TPT1		GO_BP	phosphatidylcholine biosynthesis from sn-glycero-3-phosphocholine (GO:0090640)	0.0027829	0.0521259	STARD10;APOA1
	GO_BP	reverse cholesterol transport (GO:0043691)	0.000133426	0.0100326	APOA2;APOA1;APOC3		GO_BP	cholesterol homeostasis (GO:0042632)	0.00173112	0.0660441	NPC2;APOA1;APOC3		GO_BP	regulation of myeloid cell apoptotic process (GO:0033032)	0.000165153	0.00847393	PRDX2;MAGED1;INHA;NDRG1;RTN4;TPT1		GO_BP	positive regulation of interleukin-17 secretion (GO:1905078)	0.0027829	0.0521259	MIF;INS
	GO_BP	phospholipid efflux (GO:0033700)	0.000165796	0.0115373	APOA2;APOA1;APOC3		GO_BP	nuclear-transcribed mRNA catabolic process, 5'-3' exonucleolytic nonsense-mediated decay (GO:0070479)	0.00194106	0.068373	RPS29;RPL23;RPLP2;RPS11		GO_BP	regulation of mesenchymal cell apoptotic process (GO:2001053)	0.000165153	0.00847393	PRDX2;MAGED1;INHA;NDRG1;RTN4;TPT1		GO_BP	regulation of dopamine receptor signaling pathway (GO:0060159)	0.0027829	0.0521259	RGS4;RGS16
	GO_BP	cellular response to glucose stimulus (GO:0071333)	0.000792766	0.029516	NEUROD1;APOA2;VAMP2		GO_BP	intracellular cholesterol transport (GO:0032367)	0.0028985	0.0872227	NPC2;APOA1		GO_BP	regulation of muscle cell apoptotic process (GO:0010660)	0.000165153	0.00847393	PRDX2;MAGED1;INHA;NDRG1;RTN4;TPT1		GO_BP	negative regulation of cell cycle arrest (GO:0071157)	0.00568171	0.0864685	CCND1;MIF
	GO_BP	cholesterol efflux (GO:0033344)	0.000244944	0.0136819	APOA2;APOA1;APOC3		GO_BP	propionyl-CoA biosynthetic process (GO:1902860)	0.00142854	0.0635052	ACLY;SCD		GO_BP	regulation of glial cell apoptotic process (GO:0034350)	0.000165153	0.00847393	PRDX2;MAGED1;INHA;NDRG1;RTN4;TPT1		GO_BP	extrinsic apoptotic signaling pathway via death domain receptors (GO:0008625)	0.00642566	0.090168	MLLT11;INHBA
	GO_BP	positive regulation of protein autophosphorylation (GO:0031954)	0.00130301	0.0363911	CD74;CCND1;IGF2;INS		GO_BP	apolipoprotein E recycling (GO:0071828)	0.00153813	0.0660441	APOA1;APOC3;VAMP2		GO_BP	modulation of apoptotic process in other organism (GO:0044532)	0.000165153	0.00847393	PRDX2;MAGED1;INHA;NDRG1;RTN4;TPT1		GO_BP	regulation of G-protein coupled receptor internalization (GO:1904020)	0.00295783	0.0533504	RGS4;RGS16
	GO_BP	positive regulation of calcium ion-dependent exocytosis (GO:0045956)	0.000267935	0.0144173	SYT5;RAB3A;SYT13		GO_BP	nuclear-transcribed mRNA catabolic process, nonsense-mediated decay (GO:0000184)	0.00298671	0.0885153	RPS29;RPL23;RPLP2;RPS11		GO_BP	regulation of myofibroblast cell apoptotic process (GO:1904520)	0.000165153	0.00847393	PRDX2;MAGED1;INHA;NDRG1;RTN4;TPT1		GO_BP	positive regulation of interleukin-10 secretion (GO:2001181)	0.00390757	0.0656203	MIF;INS
	GO_BP	regulation of acrosomal vesicle exocytosis (GO:2000367)	0.000165796	0.0115373	SYT5;SPINK1;SYT13		GO_BP	cholesterol import (GO:0070508)	0.00256542	0.0809348	NPC2;APOA1		GO_BP	regulation of epithelial cell apoptotic process (GO:1904035)	0.000165153	0.00847393	PRDX2;MAGED1;INHA;NDRG1;RTN4;TPT1		GO_BP	regulation of adenylate cyclase-activating glucose-activated G-protein coupled receptor signaling pathway (GO:0110033)	0.00295783	0.0533504	RGS4;RGS16
	GO_BP	regulation of Cdc42 protein signal transduction (GO:0032489)	0.000870234	0.0309329	APOA1;APOC3		GO_BP	cholesterol transport involved in cholesterol storage (GO:0010879)	0.00256542	0.0809348	NPC2;APOA1		GO_BP	regulation of execution phase of apoptosis (GO:1900117)	0.000171118	0.00847393	PRDX2;MAGED1;INHA;NDRG1;RTN4;TPT1		GO_BP	positive regulation of mitotic centrosome separation (GO:0046604)	0.00295783	0.0533504	IGF2;INS
	GO_BP	cholesterol homeostasis (GO:0042632)	0.000841137	0.0304523	APOA2;APOA1;APOC3		GO_BP	positive regulation of methyl-branched fatty acid biosynthetic process (GO:1902324)	0.00119414	0.0598908	MLXIPL;APOA1		GO_BP	regulation of compound eye retinal cell apoptotic process (GO:1901692)	0.000165153	0.00847393	PRDX2;MAGED1;INHA;NDRG1;RTN4;TPT1		GO_BP	positive regulation of proteolysis (GO:0045862)	0.00803865	0.098693	INHBA;INS
	GO_BP	negative regulation of fatty acid metabolic process (GO:0045922)	0.000596193	0.0274256	APOC3;INS		GO_BP	synaptic vesicle recycling (GO:0036465)	0.00168306	0.0660441	RAB3A;SYT7		GO_BP	regulation of apoptotic process in bone marrow (GO:0071865)	0.000165153	0.00847393	PRDX2;MAGED1;INHA;NDRG1;RTN4;TPT1		GO_BP	regulation of G-protein coupled receptor protein signaling pathway (GO:0008277)	0.00544314	0.0837098	RGS4;RGS16
	GO_BP	positive regulation of peptidyl-tyrosine phosphorylation (GO:0050731)	0.00357542	0.0594949	CD74;CCND1;IGF2;INS		GO_BP	positive regulation of unsaturated fatty acid biosynthetic process (GO:2001280)	0.00119414	0.0598908	MLXIPL;APOA1		GO_BP	regulation of fat cell apoptotic process (GO:1904649)	0.000165153	0.00847393	PRDX2;MAGED1;INHA;NDRG1;RTN4;TPT1		GO_BP	positive regulation of exit from mitosis (GO:0031536)	0.00370769	0.0652642	IGF2;INS
	GO_BP	triglyceride catabolic process (GO:0019433)	0.000503224	0.0245951	APOA2;APOA1;APOC3		GO_BP	positive regulation of butyryl-CoA biosynthetic process from acetyl-CoA (GO:1900496)	0.00119414	0.0598908	MLXIPL;APOA1		GO_BP	regulation of apoptosis involved in tissue homeostasis (GO:0060785)	0.000171118	0.00847393	PRDX2;MAGED1;INHA;NDRG1;RTN4;TPT1		GO_BP	negative regulation of G-protein coupled receptor protein signaling pathway (GO:0045744)	0.00694494	0.0914105	RGS4;RGS16
	GO_BP	insulin receptor signaling pathway (GO:0008286)	0.00421477	0.0628997	PKM;IGF2;VAMP2;INS		GO_BP	positive regulation of butyryl-CoA catabolic process to butyrate (GO:1900502)	0.00195751	0.068373	MLXIPL;APOA1		GO_BP	regulation of cysteine-type endopeptidase activity involved in apoptotic process (GO:0043281)	0.000217797	0.00873752	PRDX2;MAGED1;INHA;NDRG1;RTN4;TPT1		GO_BP	negative regulation of oskar mRNA translation (GO:0007319)	0.00642566	0.090168	IGFBP5;ENC1
	GO_BP	vesicle fusion with Golgi cis cisterna membrane (GO:1990670)	0.000701422	0.0274256	SYT5;SYT13;VAMP2		GO_BP	conversion of discoidal high-density lipoprotein particle to spherical high-density lipoprotein particle (GO:0034376)	0.0028985	0.0872227	APOA1;APOC3		GO_BP	regulation of fibroblast apoptotic process (GO:2000269)	0.000171118	0.00847393	PRDX2;MAGED1;INHA;NDRG1;RTN4;TPT1		GO_BP	negative regulation by symbiont of host translation (GO:0044074)	0.00642566	0.090168	IGFBP5;ENC1
	GO_BP	vesicle fusion with vacuole (GO:0051469)	0.000701422	0.0274256	SYT5;SYT13;VAMP2		GO_BP	high-density lipoprotein particle remodeling (GO:0034375)	0.0028985	0.0872227	APOA1;APOC3		GO_BP	regulation of anoikis (GO:2000209)	0.000171118	0.00847393	PRDX2;MAGED1;INHA;NDRG1;RTN4;TPT1		GO_BP	positive regulation of interleukin-12 secretion (GO:2001184)	0.00520933	0.081837	MIF;INS
	GO_BP	vesicle fusion with endoplasmic reticulum (GO:0048279)	0.000701422	0.0274256	SYT5;SYT13;VAMP2		GO_BP	angiotensin-mediated vasodilation involved in regulation of systemic arterial blood pressure (GO:0002033)	0.000613602	0.0571527	SERPINF2;AGT		GO_BP	regulation of apoptosis by sphingosine-1-phosphate signaling pathway (GO:0003377)	0.000203545	0.00847393	PRDX2;MAGED1;INHA;NDRG1;RTN4;TPT1		GO_BP	negative regulation of translation, ncRNA-mediated (GO:0040033)	0.00642566	0.090168	IGFBP5;ENC1
	GO_BP	vesicle fusion with vesicle (GO:0061782)	0.000701422	0.0274256	SYT5;SYT13;VAMP2		GO_BP	negative regulation of isoprenoid metabolic process (GO:0045827)	0.00033076	0.04846	NPC2;APOC3		GO_BP	regulation of apoptotic signaling pathway (GO:2001233)	0.000265328	0.0102427	PRDX2;MAGED1;INHA;NDRG1;RTN4;TPT1		GO_BP	negative regulation of translational fidelity (GO:0045902)	0.00642566	0.090168	IGFBP5;ENC1
	GO_BP	endosomal vesicle fusion (GO:0034058)	0.00123264	0.0360202	SYT5;SYT13;VAMP2								GO_BP	regulation of neuron apoptotic process (GO:0043523)	0.000420206	0.0148231	PRDX2;MAGED1;INHA;NDRG1;RTN4;TPT1		GO_BP	positive regulation of interleukin-6 secretion (GO:2000778)	0.00694494	0.0914105	MIF;INS
	GO_BP	vitamin A metabolic process (GO:0006776)	0.00143019	0.0383018	APOA2;APOA1;APOC3								GO_BP	pyruvate catabolic process (GO:0042867)	0.000131819	0.00847393	LDHA;PDHB;SLC16A3		GO_BP	negative regulation of translational elongation (GO:0045900)	0.00668298	0.0912508	IGFBP5;ENC1
	GO_BP	retinoid metabolic process (GO:0001523)	0.00136228	0.0369898	APOA2;APOA1;APOC3								GO_BP	L-alanine biosynthetic process from pyruvate (GO:0019272)	0.000131819	0.00847393	LDHA;PDHB;SLC16A3		GO_BP	positive regulation of tumor necrosis factor secretion (GO:1904469)	0.00642566	0.090168	MIF;INS
	GO_BP	high-density lipoprotein particle assembly (GO:0034380)	0.001026	0.0334304	APOA2;APOA1								GO_BP	sulphoglycolysis (GO:0061722)	0.000154484	0.00847393	LDHA;PDHB;SLC16A3		GO_BP	negative regulation of translation in response to stress (GO:0032055)	0.00694494	0.0914105	IGFBP5;ENC1
	GO_BP	retinal metabolic process (GO:0042574)	0.00164657	0.0407474	APOA2;APOA1;APOC3								GO_BP	glycolytic process via Entner-Doudoroff Pathway (GO:0061688)	0.000207085	0.00847393	LDHA;TPI1;PGK1		GO_BP	negative regulation of mitochondrial translation (GO:0070130)	0.00803865	0.098693	IGFBP5;ENC1
	GO_BP	positive regulation of protein kinase B signaling (GO:0051897)	0.00196544	0.0436816	IGF2;RTN4;INS								GO_BP	glycolytic process from glycerol (GO:0061613)	0.000207085	0.00847393	LDHA;TPI1;PGK1		GO_BP	negative regulation of acute inflammatory response (GO:0002674)	0.00642566	0.090168	APOA1;INS
	GO_BP	retinol metabolic process (GO:0042572)	0.00164657	0.0407474	APOA2;APOA1;APOC3								GO_BP	glycolytic process through fructose-6-phosphate (GO:0061615)	0.000207085	0.00847393	LDHA;TPI1;PGK1		GO_BP	positive regulation of interferon-gamma secretion (GO:1902715)	0.00694494	0.0914105	MIF;INS
	GO_BP	vesicle fusion with nuclear membrane involved in mitotic nuclear envelope reassembly (GO:0007086)	0.00123264	0.0360202	SYT5;SYT13;VAMP2								GO_BP	isopentenyl diphosphate biosynthetic process, methylerythritol 4-phosphate pathway (GO:0019288)	0.000179537	0.00847393	LDHA;PDHB;SLC16A3		GO_BP	negative regulation of cytoplasmic translation (GO:2000766)	0.00803865	0.098693	IGFBP5;ENC1
	GO_BP	phagosome-lysosome fusion (GO:0090385)	0.000943414	0.0323575	SYT5;SYT13;VAMP2								GO_BP	glycolytic process from sucrose (GO:0061704)	0.000207085	0.00847393	LDHA;TPI1;PGK1		GO_BP	negative regulation of respiratory burst involved in inflammatory response (GO:0060266)	0.00721151	0.0924213	APOA1;INS
	GO_BP	Golgi vesicle fusion to target membrane (GO:0048210)	0.00111107	0.0356089	SYT5;SYT13;VAMP2								GO_BP	glycolytic process through fructose-1-phosphate (GO:0061625)	0.000207085	0.00847393	LDHA;TPI1;PGK1		GO_BP	negative regulation of inflammatory response to antigenic stimulus (GO:0002862)	0.00748267	0.0950625	AMBP;APOA1
	GO_BP	positive regulation of triglyceride catabolic process (GO:0010898)	0.000596193	0.0274256	APOA2;APOA1								GO_BP	Entner-Doudoroff pathway (GO:0061678)	0.000154484	0.00847393	LDHA;PDHB;SLC16A3		GO_BP	regulation of inhibitory G-protein coupled receptor phosphorylation (GO:1904323)	0.00668298	0.0912508	RGS4;RGS16
	GO_BP	negative regulation of lipoprotein lipase activity (GO:0051005)	0.00177186	0.0422437	APOA2;APOC3								GO_BP	pyruvate metabolic process (GO:0006090)	0.000207085	0.00847393	LDHA;PDHB;SLC16A3		GO_BP	positive regulation of interferon-beta secretion (GO:0035549)	0.00475606	0.0763583	MIF;INS
	GO_BP	vesicle fusion with Golgi apparatus (GO:0048280)	0.00136228	0.0369898	SYT5;SYT13;VAMP2								GO_BP	L-cysteine catabolic process to pyruvate (GO:0019450)	0.000207085	0.00847393	LDHA;PDHB;SLC16A3		GO_BP	regulation of rhodopsin mediated signaling pathway (GO:0022400)	0.00721151	0.0924213	RGS4;RGS16
	GO_BP	positive regulation of MAPK cascade (GO:0043410)	0.00582108	0.0753656	CD74;CCND1;IGF2;INS								GO_BP	positive regulation of peptidyl-tyrosine autophosphorylation (GO:1900086)	0.000612626	0.0195849	CD74;CD81;IGF2;AGT
	GO_BP	positive regulation of peptidyl-tyrosine autophosphorylation (GO:1900086)	0.00251164	0.0522369	CD74;IGF2;INS								GO_BP	positive regulation of pancreatic stellate cell proliferation (GO:2000231)	0.000385824	0.0140963	CD74;S100A6;AGT
	GO_BP	vesicle fusion with endoplasmic reticulum-Golgi intermediate compartment (ERGIC) membrane (GO:1990668)	0.000997375	0.0334304	SYT5;SYT13;VAMP2								GO_BP	positive regulation of hepatic stellate cell proliferation (GO:1904899)	0.000385824	0.0140963	CD74;S100A6;AGT
	GO_BP	peroxidase-heme linkage via dihydroxyheme-L-aspartyl ester-L-glutamyl ester-L-methionine sulfonium (GO:0018363)	0.000280233	0.0144173	APOA2;APOA1								GO_BP	glucose catabolic process to pyruvate (GO:0061718)	0.000179537	0.00847393	LDHA;PDHB;SLC16A3
	GO_BP	retinoic acid metabolic process (GO:0042573)	0.00241479	0.0516642	APOA2;APOA1;APOC3								GO_BP	positive regulation of peptidyl-tyrosine phosphorylation (GO:0050731)	0.00207013	0.05229	CD74;CCND1;CD81;IGF2;AGT
	GO_BP	vesicle fusion with peroxisome (GO:0019817)	0.00180159	0.0424233	SYT5;SYT13;VAMP2								GO_BP	acetyl-CoA biosynthetic process from pyruvate (GO:0006086)	0.000237232	0.00933417	LDHA;PDHB;SLC16A3
	GO_BP	N-terminal peptidyl-methionine methylation (GO:0018014)	0.000280233	0.0144173	APOA2;APOA1								GO_BP	pyruvate biosynthetic process (GO:0042866)	0.000207085	0.00847393	LDHA;PDHB;SLC16A3
	GO_BP	positive regulation of ERK5 cascade (GO:0070378)	0.00129644	0.0363911	CD74;IGF2;INS								GO_BP	lactate biosynthetic process from pyruvate (GO:0019244)	0.000179537	0.00847393	LDHA;PDHB;SLC16A3
	GO_BP	positive regulation of MAPK cascade involved in cell wall organization or biogenesis (GO:1903139)	0.00117086	0.0360202	CD74;IGF2;INS								GO_BP	protocatechuate catabolic process, meta-cleavage (GO:0019617)	0.000344278	0.0130443	LDHA;PDHB;SLC16A3
	GO_BP	SNARE complex assembly (GO:0035493)	0.00164657	0.0407474	SYT5;SYT13;VAMP2								GO_BP	positive regulation of tyrosine phosphorylation of STAT protein (GO:0042531)	0.00197882	0.0506083	CD74;CD81;IGF2;AGT
	GO_BP	negative regulation of lipid metabolic process (GO:0045833)	0.00373779	0.0594949	APOA2;APOA1;APOC3								GO_BP	positive regulation of activation of Janus kinase activity (GO:0010536)	0.00318265	0.0757174	CD74;CD81;IGF2;AGT
	GO_BP	negative regulation of cytokine secretion involved in immune response (GO:0002740)	0.00119413	0.0360202	APOA2;APOA1								GO_BP	positive regulation of protein tyrosine kinase activity (GO:0061098)	0.00270739	0.0667389	CD74;CD81;IGF2;AGT
	GO_BP	positive regulation of MAPK cascade involved in axon regeneration (GO:1904922)	0.00129644	0.0363911	CD74;IGF2;INS								GO_BP	substantia nigra development (GO:0021762)	0.00123969	0.0338188	YWHAQ;BASP1;ACTB
	GO_BP	positive regulation of insulin receptor signaling pathway (GO:0046628)	0.00156715	0.0403129	IGF2;INS								GO_BP	insulin secretion (GO:0030073)	0.00318109	0.0757174	GAL;EDN3
	GO_BP	positive regulation of butyryl-CoA catabolic process to butyrate (GO:1900502)	0.00119413	0.0360202	APOA2;APOA1								GO_BP	plasma membrane repair (GO:0001778)	0.00174666	0.0458162	TFF3;TFF1;SYT7
	GO_BP	positive regulation of cholesterol esterification (GO:0010873)	0.00156715	0.0403129	APOA2;APOA1								GO_BP	glycolytic fermentation (GO:0019660)	0.00115113	0.0327112	LDHA;PDHB;SLC16A3
	GO_BP	negative regulation of fatty acid biosynthetic process (GO:0045717)	0.00245768	0.0516642	APOC3;INS								GO_BP	bone development (GO:0060348)	0.0036016	0.0818763	IGF2;PPIB;INHA;FBN1
	GO_BP	negative regulation of intestinal cholesterol absorption (GO:0045796)	0.0004781	0.0239663	APOA2;APOA1								GO_BP	positive regulation of histamine secretion by mast cell (GO:1903595)	0.00210464	0.0525132	EDN3;PDCD4;AGT
	GO_BP	triglyceride homeostasis (GO:0070328)	0.00297377	0.0559012	APOA1;APOC3								GO_BP	regulation of Cdc42 protein signal transduction (GO:0032489)	0.00177396	0.0459434	APOA1;APOC3
	GO_BP	positive regulation of stress-activated MAPK cascade (GO:0032874)	0.00292298	0.0559012	CD74;IGF2;INS								GO_BP	angiotensin-mediated vasoconstriction involved in regulation of systemic arterial blood pressure (GO:0001998)	0.00148343	0.0394168	EDN3;AGT
	GO_BP	positive regulation of hydrolase activity (GO:0051345)	0.00324921	0.0593664	IGF2;APOA1								GO_BP	glycerol biosynthetic process from pyruvate (GO:0046327)	0.00106667	0.030738	LDHA;PDHB;SLC16A3
	GO_BP	positive regulation of tyrosine phosphorylation of STAT protein (GO:0042531)	0.00608153	0.0782197	CD74;IGF2;INS								GO_BP	chylomicron assembly (GO:0034378)	0.00121792	0.0336739	APOA1;APOC3
	GO_BP	insulin receptor recycling (GO:0038020)	0.001026	0.0334304	IGF2;INS								GO_BP	negative regulation of plasma cell differentiation (GO:1900099)	0.00148343	0.0394168	AMBP;INHA
	GO_BP	positive regulation of glycogen biosynthetic process (GO:0045725)	0.00156715	0.0403129	IGF2;INS								GO_BP	positive regulation of cholesterol esterification (GO:0010873)	0.00318109	0.0757174	APOA1;AGT
	GO_BP	positive regulation of insulin secretion (GO:0032024)	0.00810483	0.09603	NEUROD1;ACHE;INS								GO_BP	chylomicron remodeling (GO:0034371)	0.000977718	0.0285773	APOA1;APOC3
	GO_BP	positive regulation of protein tyrosine kinase activity (GO:0061098)	0.0077111	0.0930567	CD74;IGF2;INS								GO_BP	high-density lipoprotein particle remodeling (GO:0034375)	0.00359281	0.0818763	APOA1;APOC3
	GO_BP	glycolytic process from glycerol (GO:0061613)	0.00297377	0.0559012	LDHA;ENO2								GO_BP	conversion of discoidal high-density lipoprotein particle to spherical high-density lipoprotein particle (GO:0034376)	0.00359281	0.0818763	APOA1;APOC3
	GO_BP	glycolytic process through fructose-6-phosphate (GO:0061615)	0.00297377	0.0559012	LDHA;ENO2								GO_BP	biotin transport (GO:0015878)	0.000977718	0.0285773	APOA1;SLC16A3
	GO_BP	glycolytic process via Entner-Doudoroff Pathway (GO:0061688)	0.00297377	0.0559012	LDHA;ENO2								GO_BP	low-density lipoprotein particle mediated signaling (GO:0055096)	0.00121792	0.0336739	ITGB1;CD81
	GO_BP	triglyceride mobilization (GO:0006642)	0.00324921	0.0593664	APOA2;APOC3								GO_BP	actin filament-based transport (GO:0099515)	0.00402798	0.0876729	TUBA1A;MYO10
	GO_BP	glycolytic process from sucrose (GO:0061704)	0.00297377	0.0559012	LDHA;ENO2								GO_BP	N-terminal peptidyl-methionine acetylation (GO:0017196)	0.00402798	0.0876729	NAA20;APOA1
	GO_BP	glycolytic process through fructose-1-phosphate (GO:0061625)	0.00297377	0.0559012	LDHA;ENO2								GO_BP	cytoskeleton-dependent intracellular transport (GO:0030705)	0.00402798	0.0876729	TUBA1A;MYO10
	GO_BP	triglyceride metabolic process (GO:0006641)	0.0027099	0.0546171	APOA2;APOC3								GO_BP	transport along microtubule (GO:0010970)	0.00402798	0.0876729	TUBA1A;MYO10
	GO_BP	transport along microtubule (GO:0010970)	0.00198858	0.0436816	TUBA1A;TUBB								GO_BP	vitamin A transport (GO:0071938)	0.000977718	0.0285773	APOA1;SLC16A3
	GO_BP	peptidyl-glycine cholesteryl ester biosynthesis from peptidyl-glycine (GO:0019708)	0.00642377	0.0810223	NRN1;NTM;APOA1								GO_BP	cellular response to low-density lipoprotein particle stimulus (GO:0071404)	0.000763087	0.023761	ITGB1;CD81
	GO_BP	N-terminal peptidyl-methionine acetylation (GO:0017196)	0.00198858	0.0436816	APOA2;APOA1								GO_BP	protein retention in ER lumen (GO:0006621)	0.000411641	0.0147757	PDIA3;GPAA1
	GO_BP	cytoskeleton-dependent intracellular transport (GO:0030705)	0.00198858	0.0436816	TUBA1A;TUBB
	GO_BP	actin filament-based transport (GO:0099515)	0.00198858	0.0436816	TUBA1A;TUBB
	GO_BP	induction by virus of host protein phosphorylation (GO:0039614)	0.00851024	0.0990329	CD74;CCND1;IGF2
	GO_BP	positive regulation of pancreatic stellate cell proliferation (GO:2000231)	0.00446493	0.0632532	CD74;S100A6
	GO_BP	positive regulation of inhibitory G-protein coupled receptor phosphorylation (GO:1904325)	0.00851024	0.0990329	CD74;CCND1;IGF2
	GO_BP	positive regulation of hepatic stellate cell proliferation (GO:1904899)	0.00446493	0.0632532	CD74;S100A6
	GO_BP	vesicle cytoskeletal trafficking (GO:0099518)	0.00245768	0.0516642	TUBA1A;TUBB
	GO_BP	regulation of calcium ion-dependent exocytosis (GO:0017158)	0.0027099	0.0546171	SYT5;SYT13
	GO_BP	regulation of dense core granule exocytosis (GO:1905413)	0.0027099	0.0546171	SYT5;SYT13
	GO_BP	peptidyl-methionine modification (GO:0018206)	0.000200648	0.0115373	APOA2;APOA1
	GO_BP	cellular triglyceride homeostasis (GO:0035356)	0.00479692	0.0646758	APOA1;APOC3
	GO_BP	positive regulation of hemocyte differentiation (GO:0045612)	0.00414408	0.0623206	NEUROD1;INS
	GO_BP	positive regulation of sporulation resulting in formation of a cellular spore (GO:0045881)	0.00383445	0.0594949	NEUROD1;INS
	GO_BP	positive regulation of embryo sac central cell differentiation (GO:0045693)	0.00383445	0.0594949	NEUROD1;INS
	GO_BP	positive regulation of cardiocyte differentiation (GO:1905209)	0.00383445	0.0594949	NEUROD1;INS
	GO_BP	positive regulation of myeloid cell differentiation (GO:0045639)	0.00513997	0.0678962	NEUROD1;INS
	GO_BP	positive regulation of myofibroblast differentiation (GO:1904762)	0.00383445	0.0594949	NEUROD1;INS
	GO_BP	positive regulation of pigment cell differentiation (GO:0050942)	0.00446493	0.0632532	NEUROD1;INS
	GO_BP	positive regulation of cell differentiation involved in phenotypic switching (GO:1905917)	0.00383445	0.0594949	NEUROD1;INS
	GO_BP	positive regulation of mesodermal cell differentiation (GO:1905772)	0.00383445	0.0594949	NEUROD1;INS
	GO_BP	canonical glycolysis (GO:0061621)	0.00446493	0.0632532	PKM;ENO2
	GO_BP	positive regulation of cell fate commitment (GO:0010455)	0.00479692	0.0646758	NEUROD1;INS
	GO_BP	negative regulation of protein secretion (GO:0050709)	0.00446493	0.0632532	CD74;INS
	GO_BP	positive regulation of tendon cell differentiation (GO:2001051)	0.00383445	0.0594949	NEUROD1;INS
	GO_BP	positive regulation of sclerenchyma cell differentiation (GO:1904369)	0.00383445	0.0594949	NEUROD1;INS
	GO_BP	positive regulation of synergid differentiation (GO:0045699)	0.00383445	0.0594949	NEUROD1;INS
	GO_BP	positive regulation of antipodal cell differentiation (GO:0045690)	0.00383445	0.0594949	NEUROD1;INS
	GO_BP	positive regulation of mitotic cohesin loading (GO:1905406)	0.00324921	0.0593664	IGF2;INS
	GO_BP	negative regulation of intrinsic apoptotic signaling pathway in response to DNA damage by p53 class mediator (GO:1902166)	0.00414408	0.0623206	CD74;CXCL12
	GO_BP	positive regulation of embryo sac egg cell differentiation (GO:0045696)	0.00383445	0.0594949	NEUROD1;INS
	GO_BP	positive regulation of sorocarp spore cell differentiation (GO:1901263)	0.00383445	0.0594949	NEUROD1;INS
	GO_BP	positive regulation of plant epidermal cell differentiation (GO:1903890)	0.00383445	0.0594949	NEUROD1;INS
	GO_BP	positive regulation of sorocarp stalk cell differentiation (GO:0031287)	0.00383445	0.0594949	NEUROD1;INS
	GO_BP	positive regulation of transdifferentiation (GO:1903620)	0.00383445	0.0594949	NEUROD1;INS
	GO_BP	positive regulation of leukocyte differentiation (GO:1902107)	0.00383445	0.0594949	NEUROD1;INS
	GO_BP	synaptic vesicle endocytosis (GO:0048488)	0.0062346	0.079147	SYT5;RAB3A
	GO_BP	positive regulation of metanephric DCT cell differentiation (GO:2000594)	0.00446493	0.0632532	NEUROD1;INS
	GO_BP	positive regulation of maintenance of mitotic sister chromatid cohesion (GO:0034184)	0.00479692	0.0646758	IGF2;INS
	GO_BP	peptidyl-methionine oxidation (GO:0018159)	0.000200648	0.0115373	APOA2;APOA1
	GO_BP	positive regulation of attachment of mitotic spindle microtubules to kinetochore (GO:1902425)	0.00513997	0.0678962	IGF2;INS
	GO_BP	C-terminal peptidyl-methionine amidation (GO:0018046)	0.000200648	0.0115373	APOA2;APOA1
	GO_BP	positive regulation of prolactin secretion (GO:1902722)	0.0070181	0.0852198	ACHE;INS
	GO_BP	negative regulation of calcium ion-dependent exocytosis (GO:0045955)	0.00414408	0.0623206	SYT5;SYT13
	GO_BP	positive regulation of cell development (GO:0010720)	0.00414408	0.0623206	NEUROD1;INS
	GO_BP	triglyceride biosynthetic process (GO:0019432)	0.0070181	0.0852198	APOA2;APOC3
	GO_BP	positive regulation of epithelial cell differentiation (GO:0030858)	0.00549399	0.071605	NEUROD1;INS
	GO_BP	positive regulation of stem cell differentiation (GO:2000738)	0.00479692	0.0646758	NEUROD1;INS
	GO_BP	triglyceride acyl-chain remodeling (GO:0036153)	0.00479692	0.0646758	APOA2;APOC3
	GO_BP	N-terminal peptidyl-methionine carboxylation (GO:0050988)	0.000200648	0.0115373	APOA2;APOA1
	GO_BP	response to UV-A (GO:0070141)	0.00784382	0.0935041	CCND1;CIRBP
	GO_BP	positive regulation of endodermal cell differentiation (GO:1903226)	0.0062346	0.079147	NEUROD1;INS
	GO_BP	positive regulation of skeletal muscle cell differentiation (GO:2001016)	0.0070181	0.0852198	NEUROD1;INS
	GO_BP	positive regulation of mitotic sister chromatid separation (GO:1901970)	0.00446493	0.0632532	IGF2;INS
	GO_BP	positive regulation of mitotic chromosome condensation (GO:1903380)	0.00479692	0.0646758	IGF2;INS
	GO_BP	positive regulation of vasculogenesis (GO:2001214)	0.00784382	0.0935041	NEUROD1;INS
	GO_BP	positive regulation of mitotic spindle elongation (GO:1902846)	0.00549399	0.071605	IGF2;INS
	GO_BP	positive regulation of fatty acid biosynthetic process (GO:0045723)	0.00513997	0.0678962	APOA1;INS
	GO_BP	positive regulation of insulin receptor signaling pathway by insulin receptor internalization (GO:0038015)	0.000200648	0.0115373	IGF2;INS
	GO_BP	glutathione deglycation (GO:0036531)	0.0070181	0.0852198	GSTA1;DPEP1
	GO_BP	positive regulation of hematopoietic progenitor cell differentiation (GO:1901534)	0.00479692	0.0646758	NEUROD1;INS
	GO_BP	positive regulation of exocytosis (GO:0045921)	0.00662103	0.0824466	RAB3A;VAMP2
	GO_BP	positive regulation of mitotic centrosome separation (GO:0046604)	0.00662103	0.0824466	IGF2;INS
	GO_BP	positive regulation of exit from mitosis (GO:0031536)	0.00827232	0.097424	IGF2;INS
	GO_BP	negative regulation of cholesterol import (GO:0060621)	0.000200648	0.0115373	APOA2;APOC3

## Sheet: Table S6
	Disease (identifier)	HNF1A Mutation	Age at dx	Age at study	Gender	BMI (kg/m2)	HbA1C (%)	Family history	ClinVar (HNF1A)
	MODY3 Pt1 (1056)	460_461fs_insCGGCATCCAGCACCTGC	17	25	M	26.5	6.1	Father and paternal grandmother dx with T2D, non-obese, onset 30s	Not provided
	MODY3 Pt2 (1075)	R200Q	37	45	F	22.6	10.3	Mother dx with T2D, non-obese, onset 50s, daughter MODY3 Pt3	Likely pathogenic
	MODY3 Pt3 (1076)	R200Q	13	15	F	23.3	6.9	Mother is MODY3 Pt2, grandmother dx with T2D, non-obese, onset 50s	Likely pathogenic

## Sheet: Table S7
	Primary Antibody	Species	Dilution	Company	Catalog number
	SOX17	goat	1:100	R&D Systems	AF1924
	PDX1	goat	1:100	R&D Systems	AF2419
	NKX6.1	mouse	1:400	Developmenta Studies hybridoma bank	F55A10
	C-PEP	rat	1:100	Developmenta Studies hybridoma bank	GN-ID4
	Glucagon	guinea pig	1:200	Takara	M182
	Somatostatin	rabbit	1:200	Sigma	332A-16
	HNF1A	rabbit	1:400	Abcam	ab96777
	MAFA	rabbit	1:100	Abcam	ab26405
	Synaptophysin	rabbit	1:50	Novus Biologicals	NB300-653
	Trypsin	sheep	1:100	R&D Systems	AF3848
	GFP	chick	1:200	Abcam	ab13970
	Ki67	rabbit	1:200	Abcam	ab16667
	SMA	mouse	1:500	DAKO	M0851
	Anti-b-Tubulin III	rabbit	1:500	Sigma	T2200
	Secondary Antibody		Dilution	Company	Catalog number
	Alexa Fluor® 488 Donkey Anti-Rat		1:500	Jackson ImmunoResearch Laboratories	712-545-153
	Alexa Fluor® 488 Donkey Anti-mouse		1:500	Life Technologies	A-21202
	Alexa Fluor® 555 Donkey Anti-Goat		1:500	Life Technologies	A-21432
	Alexa Fluor® 555 Donkey Anti-Rabbit		1:500	Life Technologies	A-31572
	Alexa Fluor® 555 Donkey Anti-chick		1:500	Jackson ImmunoResearch Laboratories	703-585-155
	Alexa Fluor® 555 Donkey Anti-sheep		1:500	Life Technologies	A-21436
	Alexa Fluor® 647 Donkey Anti-GP		1:500	Life Technologies	A-31572
	Alexa Fluor® 647 Donkey Anti-mouse		1:500	Life Technologies	A-31571
	Alexa Fluor® 647 Donkey Anti-Rabbit		1:500	Jackson ImmunoResearch Laboratories	711-605-152
	Alexa Fluor® 647 Donkey Anti-Goat		1:500	Life Technologies	A21447
	Anti-rat 6nm gold		1:50	Electron Miscroscopy Sciences	25184
